# Supplementary material for: Chemical characterization of oxygenated organic compounds in the gas phase and particle phase using iodide CIMS with FIGAERO in urban air
Source: Copernicus journal article supplement (doi:10.5194/acp-21-8455-2021), 2021-06-03
Supplement: Supplementary file 1 [file acp-21-8455-2021-supplement.zip]

Archive with 3 entries (3 files):
- acp-21-8455-2021-supplement-title-page.pdf
- overview of FIGAERO-CIMS measurements_SI_ycs_v40.pdf
- overview of FIGAERO-CIMS measurements_Data_v2.xlsx
