# Supplementary material for: Chemical characterization of oxygenated organic compounds in the gas phase and particle phase using iodide CIMS with FIGAERO in urban air
Source: Copernicus journal article supplement (doi:10.5194/acp-21-8455-2021), 2021-06-03
Supplement: Supplementary file 1 [file acp-21-8455-2021-supplement.zip › acp-21-8455-2021-supplement-title-page.pdf]

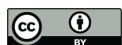

*Supplement of*

**Chemical characterization of oxygenated organic compounds in the gas phase and particle phase using iodide CIMS with FIGAERO in urban air**

**Chenshuo Ye et al.**

*Correspondence to:* Bin Yuan (byuan@jnu.edu.cn)

- [acp-21-8455-2021-supplement-title-page.pdf](#)
- [overview of FIGAERO-CIMS measurements\\_Data\\_v2.xlsx](#)
- [overview of FIGAERO-CIMS measurements\\_SI\\_ycs\\_v40.pdf](#)

The copyright of individual parts of the supplement might differ from the article licence.
