# Supplementary material for: Chemical characterization of oxygenated organic compounds in the gas phase and particle phase using iodide CIMS with FIGAERO in urban air
Source: Copernicus journal article supplement (doi:10.5194/acp-21-8455-2021), 2021-06-03
Supplement: Supplementary file 1 [file acp-21-8455-2021-supplement.zip › overview of FIGAERO-CIMS measurements_Data_v2.xlsx]

## Sheet: Instruction
Instruction
table name	item	interpretation
sensitivity from volt-scan	ion formula	unit mass and formula of an I cluster ion
	m/z	mass-to-charge ratio of an I cluster ion
	dV50 (V)	location of the voltage at half signal maximum
	response factor (ncps/ppt)	final response factor ofan I cluster ion (transmission efficiency corrected)
sensitivity from calibration	ion formula	unit mass and formula of the product ion of the calibrated species
	calibration factor (ncps/ppt)	calibration factor derived from laboratory experiments
	under absolute humidity (mmol/mol)	the humidity conditions of calibration experiments
humidity curve	NO.	number
	species	species
	humidity curves under absolute humidity=0	x is the absolute humidity, y is the signal relative to the signal at AH=0

## Sheet: sensitivity from volt-scan
ion formula	m/z	dV50 (V)	response factor (ncps/ppt)
m143_IO	142.9	15.5914	68.1024
m144_IHO	143.908	3.68894	48.7512
m145_IH2O	144.916	2.35345	40.8828
m154_IHCN	153.916	3.51259	50.0324
m155_ICO	154.9	8.02514	68.0514
m155_IN2	154.911	7.28612	66.5362
m159_IS	158.877	19.0574	73.3963
m159_IO2	158.895	13.8513	73.1219
m159_CH4IO	158.931	2.80047	46.5094
m160_IHO2	159.903	1.63773	39.0769
m161_IH2O2	160.911	8.57348	70.6672
m162_ICl	161.874		16.4569
m162_H3IO2	161.918		16.4597
m163_IHCl	162.882	3.85075	54.0325
m163_IH4O2	162.926	2.63318	46.13
m165_F2I	164.902		16.647
m165_C3H2I	164.921		16.6482
m167_IAr	166.867		16.7662
m168_IC2H3N	167.932		16.8292
m169_C2H2IO	168.916	10.3374	74.664
m170_IHNCO	169.911	6.41885	67.9625
m170_C2H5IN	169.947	8.1754	72.3899
m171_ICO2	170.895		16.9993
m171_C2H4IO	170.931		17.0013
m171_CH4IN2	170.942		17.0019
m172_CH3INO	171.926	4.41422	59.2031
m172_IC2H5O	171.939		17.0572
m173_INO2	172.898	8.21016	73.1507
m173_ICH2O2	172.911	5.21912	63.6845
m174_IHNO2	173.906	5.42924	64.8784
m175_IO3	174.89	6.14849	68.0805
m175_ICH3OOH	174.926	6.80224	70.2936
m177_CClH3I	176.897	4.39342	59.9862
m177_H2IO3	176.905	4.98339	63.2649
m178_ClIO	177.869	0.685959	35.5104
m178_IH3O3	177.913		17.3675
m179_ClHIO	178.877	-1.70795	24.9327
m179_H4IO3	178.921	2.30729	46.3197
m179_H8IN2O	178.969	0.264037	33.2288
m181_C3H2IO	180.916	2.28398	46.4024
m181_H6IO3	180.937	5.59416	66.9484
m182_C2HINO	181.911		17.5543
m182_C3H5IN	181.947		17.5559
m183_C2H2INO	182.919		17.5986
m183_C3H4IO	182.931		17.5991
m183_IC2H4N2	182.942		17.5996
m184_IC2H3NO	183.926	2.20778	46.2102
m184_C3H7IN	183.963		17.6433
m185_C2H2IO2	184.911		17.6828
m185_ICH2N2O	184.922	3.17726	53.2401
m185_C2H6IN2	184.958		17.6847
m186_ICHNS	185.888		17.7224
m186_ICHNO2	185.906	8.15753	75.6773
m186_IC2H5NO	185.942		17.7246
m187_ICO3	186.89	2.49166	48.5664
m187_IC2H4O2	186.926	6.77609	72.4428
m187_CH4IN2O	186.937	4.68917	63.2701
m187_C2H6INO	186.95	0.725637	36.566
m188_IClCN	187.877	2.49894	48.7222
m188_CH3INO2	187.921	6.11513	70.2695
m188_C2H5IO2	187.934	2.76332	50.637
m188_IC2H7NO	187.958		17.8028
m189_INO3	188.893	0.154828	33.4297
m189_ICH2O3	188.905	5.64004	68.4092
m189_H2IN2O2	188.917	4.19597	60.5705
m189_CH4INO2	188.929	2.25442	47.062
m189_IC2H6O2	188.942	3.69372	57.2928
m190_IHNO3	189.901	4.80134	64.2969
m191_ISO2	190.867		17.9071
m191_ICHClO	190.877		17.9075
m191_IO4	190.885	3.27588	54.6156
m191_CH4IO3	190.921	6.00131	70.238
m192_IS2H	191.857		17.9404
m192_IHSO2	191.875	5.26096	66.9887
m193_H2IO4	192.9	2.78268	51.2677
m193_C4H2IO	192.916		17.9746
m193_C3H2IN2	192.927	3.24361	54.5912
m193_CH6IO3	192.937		17.9752
m194_IOClO	193.864		18.004
m194_H3IO4	193.908		18.0054
m194_IC4H5N	193.947		18.0066
m195_ClHIO2	194.872	2.38459	48.5275
m195_H4IO4	194.916	3.76782	58.427
m195_IC5F9O2-	194.941		18.0361
m195_C3H4IN2	194.942		18.0362
m196_C3H3INO	195.926	4.0343	60.2951
m196_C4H5IO	195.939		18.0647
m196_C4H7IN	195.963	1.96014	45.5253
m197_ICl2	196.843	6.39921	72.4867
m197_IC3H2O2	196.911	4.82916	65.2368
m197_IC2H2N2O	196.922	2.02621	46.0685
m197_C3H4INO	196.934		18.0918
m197_IC3H6N2	196.958		18.0925
m198_IC2HNO2	197.906	-1.64059	26.1552
m198_IC2H5NCO	197.942		18.1181
m198_C4H9IN	197.979		18.119
m199_IC3H4O2	198.926	2.31678	48.3208
m199_C3H6INO	198.95	3.99419	60.294
m199_C4H8IO	198.963	4.72073	64.8052
m200_IC2H3NO2	199.921	0.918664	38.6114
m200_C3H7INO	199.958		18.1667
m201_IC2H2O3	200.905	5.98099	71.2471
m201_IC3H6O2	200.942	4.60328	64.2774
m201_C3H8INO	200.966	3.63033	57.9784
m201_C4H10IO	200.978	4.3771	62.9057
m202_CHINO3	201.901	4.58123	64.2171
m202_C2H3IO3	201.913	5.19283	67.6383
m202_IC2H5NO2	201.937	3.85669	59.5948
m202_C3H9INO	201.973	6.03753	71.5688
m203_IC2H4O3	202.921	5.43352	68.927
m203_IC3H8O2	202.957	5.83997	70.8087
m204_CH3INO3	203.916	9.34505	79.7261
m204_C2H5IO3	203.929	4.53273	64.0616
m205_C2ClH3IO	204.892		18.2639
m205_ICH2O4	204.9	3.53485	57.5483
m205_CH4INO3	204.924	4.21218	62.1217
m205_CH6IN2O2	204.948	-6.65716	19.1664
m206_IHNO4	205.896	4.95849	66.6423
m206_CH5INO3	205.932	1.69303	44.1403
m207_IO3S	206.862	6.12918	72.27
m207_ICHClO2	206.872	2.71276	51.6622
m207_CH4IO2S	206.898	2.65799	51.2571
m207_C4H4IN2	206.942	-12.8978	18.3463
m208_ClINO2	207.867	2.11924	47.3008
m208_H3INO2S	207.893	1.59197	43.4871
m208_H3INO4	207.911	5.22265	68.1606
m209_H2IO3S	208.877	4.97958	66.9028
m209_C4H2IO2	208.911	3.17031	55.1058
m209_C5H6IO	208.947		18.3201
m209_C5H8IN	208.971		18.3204
m210_C3HINO2	209.906	5.43893	69.3369
m210_IC4H5NO	209.942	8.15747	78.271
m211_ClHIO3	210.866	-1.84866	25.8167
m211_C4H4IS	210.908	2.94455	53.5084
m211_C4H4IO2	210.926	7.13926	75.8983
m211_C3H4IN2O	210.937	3.80771	59.6868
m211_C4H6INO	210.95	1.12068	40.3117
m211_C5H8IO	210.963		18.34
m211_C5H10IN	210.986		18.3402
m212_IC3H3NO2	211.921	6.45835	73.7371
m212_IC3H7NCO	211.958	2.99716	53.9207
m212_C5H11IN	211.994	4.13436	61.9012
m213_IC3H2O3	212.905	-1.9291	25.5955
m213_IC4H6O2	212.942	9.27295	80.1072
m213_C4H8INO	212.966	13.657	82.4961
m213_C5H10IO	212.978	-3.39989	22.2411
m214_C2HINO3	213.901	4.66623	65.2559
m214_IC3H5NO2	213.937	5.32717	68.8899
m214_C4H9INO	213.973	4.87061	66.4409
m215_ClH5IO3	214.898	6.84043	75.0963
m215_C2H2INO3	214.908	2.41814	49.6632
m215_IC3H4O3	214.921	1.8198	45.2546
m215_C3H6INO2	214.945	5.05954	67.5016
m215_IC4H8O2	214.957	-4.02464	21.3221
m215_C4H10INO	214.981	1.95179	46.216
m216_C2H3INO3	215.916	5.72437	70.8225
m216_C3H7INO2	215.953	5.71442	70.7775
m217_IC2H2O4	216.9	6.29321	73.2028
m217_IC3H6O3	216.937	4.6646	65.2747
m217_IC4H10O2	216.973	8.10071	78.317
m218_C2H3IO2S	217.89	6.53883	74.1036
m218_C2H3IO4	217.908	7.24552	76.3102
m218_C2H5INO3	217.932	4.20088	62.3986
m219_IN2O4	218.891	6.99266	75.5777
m219_IC3H5ClO	218.908	5.18381	68.1741
m219_IC2H4O4	218.916	7.54316	77.078
m219_C2H6INO3	218.94	5.59069	70.2031
m219_IC3H8O3	218.952	6.10863	72.4716
m220_C2H5IO4	219.924	-0.629586	30.4506
m220_C6H5IO	219.939	2.44587	49.8694
m220_C6H7IN	219.963	7.99755	78.0905
m221_CH2IO3S	220.877	3.63468	58.5518
m221_IC2H3ClO2	220.887	1.78766	45.0122
m221_IC5H2O2	220.911	1.13242	40.4331
m221_IC2H6O4	220.932	3.80599	59.7383
m221_IC6H6O	220.947	2.70774	51.8088
m221_C6H8IN	220.971	2.54211	50.5749
m222_CH3IO3S	221.885	-1.49075	27.0026
m222_HINO5	221.89	0.787328	38.1691
m222_C5H5INO	221.942	6.60541	74.2806
m222_C6H9IN	221.979		18.3536
m223_IO4S	222.857	6.3253	73.2464
m223_CH4IO3S	222.893	7.52804	76.9631
m223_IC5H4O2	222.926	3.80603	59.6995
m223_C5H6INO	222.95	4.86696	66.3744
m224_ClINO3	223.862	6.34541	73.2903
m224_ClH2IN2O2	223.885	6.93046	75.28
m224_H3INO5	223.906	0.850498	38.541
m224_C4H3INO2	223.921	4.30757	62.986
m224_C5H7INO	223.958	-4.46474	20.7707
m225_IH2SO4	224.872	3.97939	60.818
m225_IH3PO4	224.882	4.04308	61.2414
m225_IC4H2O3	224.905	3.97347	60.7773
m225_IC5H6S	224.924	4.15804	61.9941
m225_IC5H6O2	224.942	-1.25768	27.8039
m225_C5H8INO	224.966	4.31075	62.9726
m225_C6H10IO	224.978	9.06093	79.7276
m225_C6H12IN	225.002	6.10407	72.3081
m226_IC4H5NO2	225.937	2.31947	48.8114
m226_IC5H9NO	225.973	6.06668	72.115
m227_C2F3H3IO	226.919	3.1985	55.2739
m227_IC4H4O3	226.93	2.30529	48.6746
m227_IC5H8O2	226.957	3.70591	58.8795
m227_C5H10INO	226.981	3.75536	59.2199
m227_C6H12IO	226.994	5.45127	69.3074
m228_C3H3INO3	227.916	3.98918	60.763
m228_IC4H7NO2	227.953	3.21172	55.3284
m228_C5H11INO	227.989	-3.99535	21.2787
m229_C3H2IO4	228.9	7.63633	76.9406
m229_IC4H6O3	228.937	6.48333	73.5523
m229_IC5H10O2	228.973	5.10114	67.4134
m230_C2HINO4	229.896	7.21587	75.8
m230_C3H5INO3	229.932	6.44289	73.3435
m230_IC4H9NO2	229.968	7.0643	75.365
m231_IC3H4O4	230.916	6.76472	74.377
m231_IC4H8O3	230.952	4.21878	62.1012
m231_IC5H12O2	230.989	2.30455	48.5044
m232_IBrCN	231.826	6.93988	74.8583
m232_C2H3INO4	231.911	7.97718	77.475
m232_C3H7INO3	231.948	6.76374	74.2961
m232_C7H7IN	231.963	3.47221	56.9908
m232_C4H11INO2	231.984	3.70504	58.6159
m233_C2H2IO5	232.895	6.41564	73.0252
m233_C2H4INO4	232.919	6.96476	74.8452
m233_IC3H6O4	232.932	6.96861	74.8558
m233_IC4H10O3	232.968	3.54902	57.4689
m234_C2H3IO3S	233.885	6.18274	72.0632
m234_C2H3IO5	233.903	-2.52243	23.7944
m234_C2H5INO4	233.927	4.15653	61.5014
m234_IC6H5NO	233.942	2.77099	51.7884
m234_C7H7IO	233.955	-0.924577	28.8881
m235_C2H4IOS2	234.875	4.74749	65.0405
m235_IN2O5	234.886	4.05668	60.7805
m235_C2H4IO3S	234.893	3.24161	55.1559
m235_C2H4IO5	234.911	3.94338	60.0304
m235_IC6H4O2	234.926	0.382378	35.3297
m235_C3H8IO4	234.947	2.5344	49.9817
m235_IC7H8O	234.963	2.53184	49.9619
m235_C4H12IO3	234.984		18.1635
m236_CH3INO5	235.906	7.52848	76.1011
m236_C5H3INO2	235.921	6.14238	71.7196
m236_C6H7INO	235.958		18.1404
m237_C2ClH3IO3	236.882	5.40653	68.3741
m237_IC5H2O3	236.905	1.85345	44.8879
m237_C5H4INO2	236.929	7.792	76.6054
m237_IC6H6O2	236.942	5.84208	70.3766
m237_C6H8INO	236.966		18.1153
m238_HINO6	237.885	6.36446	72.3675
m238_C5H3IO3	237.913	3.79004	58.7563
m238_C5H5INO2	237.937	0.618978	36.5837
m238_C6H9INO	237.973	3.45685	56.4504
m239_CH4IO4S	238.888	7.65581	76.0767
m239_IC5H4O3	238.921	3.05903	53.5316
m239_C4H4IN2O2	238.932	5.0438	66.3117
m239_H6IN3O4	238.941	4.97961	65.9647
m239_IC6H8O2	238.957	3.55445	57.0478
m239_C6H10INO	238.981	2.4515	49.0906
m239_C7H12IO	238.994	4.23576	61.5789
m240_ClINO2S	239.839	6.6848	73.2622
m240_C4H3INO3	239.916	7.384	75.2912
m240_C5H7INO2	239.953	4.2175	61.3696
m240_C6H11INO	239.989	-0.212418	31.873
m241_IBrCl	240.792	8.6964	77.8149
m241_IC2F3HO2	240.898	6.87818	73.7483
m241_C5H6IO3	240.937	6.27167	71.6739
m241_IC6H10O2	240.973	5.26232	67.2269
m242_C4H3IO4	241.908	1.98625	45.4818
m242_C4H5INO3	241.932	6.21372	71.3307
m242_C5H9INO2	241.968	7.00613	73.9954
m242_C6H11IO2	241.981	4.20967	61.1095
m243_IC4H4O4	242.916	6.41136	71.9368
m243_C8H4IO	242.931	7.92036	76.1364
m243_IC5H8O3	242.952	5.75782	69.3275
m243_IC6H12O2	242.989	3.79557	58.3007
m244_C3H3INO4	243.911	7.66722	75.4458
m244_C4H7INO3	243.948	4.91574	65.0493
m244_IC5H11NO2	243.984	5.59469	68.4612
m245_C3H2IO5	244.895	3.47926	55.9342
m245_IC4H6O4	244.932	6.52879	72.0726
m245_IC5H10O3	244.968	4.27201	61.1579
m245_IC6H14O2	245.004	5.77937	69.1504
m246_Cl2HIOS	245.818	5.33965	67.0043
m246_C3H5INO4	245.927	1.97524	45.0565
m246_IC7H5NO	245.942	5.13684	65.9661
m246_IC4H9NO3	245.963	6.27161	71.0023
m247_C3H4IO5	246.911	7.86394	75.4224
m247_IC4H8O4	246.947	6.83921	72.7839
m247_IC8H8O	246.963	5.8392	69.13
m247_IC5H12O3	246.984	5.00435	65.129
m248_C2H3INO5	247.906	3.74611	57.3966
m248_IC6H3NO2	247.921	4.18536	60.2433
m248_IC3H7NO4	247.943	5.82888	68.9402
m248_C7H7INO	247.958	1.62121	42.3877
m248_C8H11IN	247.994	7.05043	73.2447
m249_C2H2IO4S	248.872	2.51811	48.6529
m249_C2H2IO6	248.89	-3.06227	22.0653
m249_C2H4INO5	248.914	8.08112	75.529
m249_IC7H6O2	248.942	5.35042	66.6081
m249_IC4H10O4	248.963	3.08935	52.7312
m249_IC8H10O	248.978	5.15108	65.6087
m250_C6H3IO3	249.913	1.7445	43.051
m250_C2H5INO5	249.922	0.0209262	32.4305
m250_C6H5INO2	249.937	5.70969	68.1158
m250_C7H9INO	249.973	8.80992	76.559
m251_C2H4IO4S	250.888	8.188	75.3833
m251_C2H4IO6	250.906	3.54439	55.6479
m251_IC6H4O3	250.921	-0.304836	30.7327
m251_C3H8IO5	250.941	2.16549	45.902
m251_IC7H8O2	250.957	-0.671847	29.0651
m251_C6H8IN2O	250.969	4.70534	62.9124
m251_IC8H12O	250.994	5.70833	67.9396
m252_IBrNO2	251.816	5.64287	67.5149
m252_C5H3INO3	251.916	6.40843	70.5463
m252_C6H5IO3	251.929	6.40057	70.5164
m252_C6H7INO2	251.953	1.88195	43.7945
m252_C7H9IO2	251.965	2.08576	45.2238
m253_C5H2IO4	252.9	4.12306	59.1506
m253_IC6H6O3	252.937	4.33037	60.4206
m254_C5H5INO3	253.932	6.14244	69.213
m254_C6H9INO2	253.968		17.5056
m254_C7H13INO	254.005	6.22113	69.4964
m254_IC8H17N	254.041	1.41391	40.3805
m255_IO6S	254.847	7.23117	72.5237
m255_IC5H4O4	254.916	7.30279	72.6957
m255_C5H6INO3	254.94	5.38191	65.7788
m255_IC6H8O3	254.952	5.47617	66.2185
m255_C6H10INO2	254.976	5.24327	65.102
m255_IC7H12O2	254.989	1.9736	44.0894
m256_C4H3INO4	255.911	7.629	73.2825
m256_C5H7INO3	255.948	0.134739	32.5283
m256_IC6H11NO2	255.984	1.78328	42.6575
m256_C7H15INO	256.02	2.85491	50.1656
m257_C4H2IO5	256.895	9.81356	76.3578
m257_IC5H6O4	256.932	6.53447	70.0465
m257_IC6H10O3	256.968	5.69007	66.8088
m257_IC7H14O2	257.004	2.95449	50.7251
m258_C4H5INO4	257.927	6.19187	68.6427
m258_IC5H9NO3	257.963	3.85971	56.6846
m258_C6H13INO2	258	3.49842	54.3064
m259_C4H4IO5	258.911	6.92781	70.8675
m259_IC5H8O4	258.947	5.57986	65.9453
m259_IC6H12O3	258.984	7.49159	72.3279
m259_IC7H16O2	259.02	7.89139	73.1932
m260_C3H3INO5	259.906	7.79453	72.8006
m260_C4H7INO4	259.943	6.22507	68.3572
m260_C5H11INO3	259.979	5.9136	67.1538
m260_C6H15INO2	260.015	7.52718	72.1879
m261_C3H2IO4S	260.872	5.43911	64.9282
m261_IC4H6O5	260.927	6.78002	70.0009
m261_IC8H6O2	260.942	4.58682	60.5529
m261_IC5H10O4	260.963	8.01152	72.9997
m261_IC6H14O3	260.999	5.42442	64.8351
m262_C3H5INO5	261.922	7.21515	71.0015
m262_IC7H5NO2	261.937	3.16366	51.4144
m262_C4H9INO4	261.958	3.7016	54.9904
m262_C8H9INO	261.973	2.04071	43.6572
m263_IC4H5ClO3	262.898	5.3733	64.2113
m263_C3H4IO6	262.906	7.90751	72.3509
m263_IC5H9ClO2	262.934	4.06578	57.1138
m263_C4H8IO5	262.942		17.0527
m263_IC8H8O2	262.957	2.87457	49.2705
m263_C5H12IO4	262.979	6.25415	67.8162
m263_IC9H12O	262.994	4.11246	57.3882
m264_C3H5IO4S	263.896	1.52495	39.9416
m264_C6H3INO3	263.916	1.41522	39.2271
m264_C3H7INO5	263.937	5.23605	63.3466
m264_IC7H7NO2	263.953	4.65954	60.3755
m264_C8H11INO	263.989	6.63421	68.8708
m264_C8H13IN2	264.013	4.09581	57.0963
m265_C3ClH3IO4	264.877	5.17254	62.8425
m265_C2H4INO4S	264.891	4.17339	57.3975
m265_C2H4INO6	264.909	4.11645	57.0513
m265_C3H6IO6	264.921	6.11969	66.8936
m265_IC7H6O3	264.937	6.03266	66.562
m265_IC8H10O2	264.973	5.62694	64.9055
m265_IC9H14O	265.009	5.95727	66.2543
m266_IC6H5NO3	265.932	5.91072	65.8643
m266_C7H7IO3	265.945	0.118439	31.4557
m266_C8H11IO2	265.981	6.94995	69.3478
m267_IN2O7	266.876	0.583419	33.8337
m267_IC6H4O4	266.916	6.44402	67.5761
m267_IC8H9Cl	266.944	3.71625	54.1783
m267_IC7H8O3	266.952	3.13474	50.3694
m267_IC8H12O2	266.989	5.11999	62.1337
m268_C5H3INO4	267.911	2.83049	48.1502
m268_C6H7INO3	267.948	5.2436	62.517
m268_C7H11INO2	267.984	4.63641	59.4205
m268_C8H15INO	268.02	6.59182	67.7912
m269_H2IN2O7	268.891	4.92245	60.731
m269_C5H4INO4	268.919	5.97574	65.4254
m269_IC6H6O4	268.932	7.27375	69.4781
m269_IC7H10O3	268.968	6.31318	66.642
m269_IC8H14O2	269.004	3.43757	51.9958
m270_C5H5INO4	269.927	2.46719	45.3477
m270_C6H9INO3	269.963	4.44887	57.9627
m270_C7H13INO2	270	4.15778	56.2796
m270_C8H17INO	270.036	6.55342	67.1751
m271_C5H4IO5	270.911	4.56195	58.383
m271_IC6H8O4	270.947	6.81216	67.7302
m271_IC10H8O	270.963	2.67468	46.5689
m271_C7H12IO3	270.984	3.84965	54.2178
m271_IC8H16O2	271.02	6.63327	67.1777
m272_C4H3INO5	271.906	3.16804	49.6828
m272_C5H7INO4	271.943	2.00091	41.8985
m272_C6H11INO3	271.979	5.97333	64.6737
m273_C4H2IO6	272.89	8.72544	71.1609
m273_C4H4INO5	272.914	4.6895	58.6197
m273_IC5H6O5	272.927	6.94168	67.5827
m273_IC6H10O4	272.963	6.41814	65.9979
m273_C7H14IO3	272.999	6.33447	65.7101
m273_IC8H18O2	273.036	4.68386	58.5621
m274_C4H5INO5	273.922	3.9139	53.9954
m274_C9H7IO2	273.95	3.08049	48.7168
m274_C5H9INO4	273.958	4.12189	55.2233
m274_C6H13INO3	273.995	1.61689	39.0854
m274_C7H15IO3	274.007	6.10875	64.6638
m274_C7H17INO2	274.031	4.9974	59.9284
m274_C8H19IO2	274.044		16.3848
m275_C4ClHIO4	274.861	3.98054	54.1921
m275_C4H4IO6	274.906	6.50092	65.7582
m275_C5H8IO5	274.942	7.3874	68.1666
m275_IC6H12O4	274.979	4.94928	59.4653
m275_IC7H16O3	275.015	7.571	68.5573
m276_C3H3INO6	275.901	8.99521	70.659
m276_IC7H3NO3	275.916	5.63925	62.3611
m276_C4H7INO5	275.937	6.44556	65.3073
m276_C8H7INO2	275.953	2.96032	47.542
m276_C5H11INO4	275.974	3.04292	48.077
m276_C9H11INO	275.989	9.65957	71.3392
m276_IC10H15N	276.025	3.03261	47.9997
m277_C4F2IO4	276.882	6.03733	63.6564
m277_C3H4INO6	276.909	5.14835	59.9515
m277_C4H6IO6	276.921	4.20911	55.0637
m277_IC8H6O3	276.937	5.85718	62.9663
m277_C5H10IO5	276.958	7.69474	68.2734
m277_IC9H10O2	276.973	-1.78866	22.9561
m277_C6H14IO4	276.994	2.50563	44.3588
m278_C3H3IO7	277.893	5.42292	60.9402
m278_C3H5INO6	277.917	8.27891	69.0639
m278_C4H7IO6	277.929	3.36074	49.7207
m278_C4H9INO5	277.953	2.0878	41.4581
m278_C5H11IO5	277.966	5.07987	59.3654
m278_C9H13INO	278.005	-1.19069	24.676
m278_IC10H17N	278.041	8.59106	69.5023
m279_C3H4IO5S	278.883	5.32689	60.2643
m279_C4ClH5IO4	278.893	4.86743	58.1045
m279_C7H4IO4	278.916	6.98271	66.0572
m279_IC5H9ClO3	278.929	5.28546	60.0679
m279_IC8H8O3	278.952	4.32942	55.2663
m279_C5H12IO5	278.973	5.26268	59.9542
m279_IC9H12O2	278.989	1.85975	39.8163
m279_C10H16IO	279.025	-1.27077	24.3051
m280_C6H3INO4	279.911	11.5766	71.3436
m280_IC7H7NO3	279.948	6.77992	65.2116
m280_C8H11INO2	279.984	3.10873	47.6908
m280_C9H15INO	280.02	2.5438	44.039
m281_C6H2IO5	280.895	3.12824	47.625
m281_C7H6IO4	280.932	5.67845	61.2036
m281_IC8H10O3	280.968	4.05643	53.2526
m281_C9H14IO2	281.004	4.90213	57.7434
m282_IC2H3SO6	281.87	5.97061	62.0618
m282_IC6H5NO4	281.927	6.18924	62.8164
m282_C7H9INO3	281.963	8.16334	67.672
m282_C8H13INO2	282	6.51224	63.8399
m282_C9H17INO	282.036	7.8332	67.0626
m283_IC2H3ClNO5	282.875	6.56673	63.7536
m283_IC6H4O5	282.911	6.93977	64.7923
m283_IC7H8O4	282.947	5.77672	61.0376
m283_IC8H12O3	282.984	5.41703	59.5724
m283_C9H16IO2	283.02	3.70309	50.7058
m284_IC5H3NO5	283.906	4.88476	56.9099
m284_IC6H7NO4	283.943	5.40673	59.2685
m284_C7H11INO3	283.979	4.0561	52.5333
m284_C8H15INO2	284.015	4.04865	52.4823
m285_IBr2	284.742	5.77463	60.5288
m285_IC6H6O5	284.927	5.53876	59.5469
m285_IC10H6O2	284.942	6.89917	64.0836
m285_IC7H10O4	284.963	7.22102	64.8819
m285_IC8H14O3	284.999	6.42411	62.7006
m285_IC9H18O2	285.036	2.90524	45.3414
m286_C5H5INO5	285.922	7.11727	64.3427
m286_C6H9INO4	285.958	6.42166	62.4116
m286_C7H13INO3	285.995	2.28355	41.2202
m286_C8H17INO2	286.031	4.41407	53.9813
m287_C5H4IO6	286.906	9.08594	67.3955
m287_IC6H8O5	286.942	6.65182	62.8041
m287_IC10H8O2	286.957	3.61698	49.2766
m287_IC7H12O4	286.979	5.79939	59.9868
m287_IC8H16O3	287.015	3.02572	45.6692
m287_IC9H20O2	287.051	1.00813	33.389
m288_C8H3INO3	287.916	4.08288	51.7143
m288_IC5H7NO5	287.937	6.46582	61.9583
m288_C6H11INO4	287.974	4.62006	54.5365
m288_C7H15INO3	288.01	3.95722	50.9892
m289_C5H6IO6	288.921	7.51006	64.2994
m289_IC6H10O5	288.958	6.89039	62.8418
m289_IC7H14O4	288.994	8.43262	65.8878
m289_IC8H18O3	289.031	3.10664	45.7214
m290_C4H5INO6	289.917	7.15887	63.2089
m290_C5H9INO5	289.953	4.03918	50.9603
m290_C6H13INO4	289.989	4.80983	54.9239
m290_IC10H13NO	290.005	2.38734	41.0679
m290_C11H17IN	290.041	3.09996	45.4531
m291_IC3F5HO2	290.895	4.47267	53.0167
m291_C4H4IO7	290.901	2.26897	40.1569
m291_C4H6INO6	290.925	6.30148	60.5485
m291_C5H8IO6	290.937	6.40786	60.8737
m291_C5H10INO5	290.961	6.33184	60.6325
m291_C6H12IO5	290.973	4.11466	51.1129
m291_IC10H12O2	290.989	3.18296	45.7402
m292_C7H3INO4	291.911	6.5537	61.0055
m292_C8H5IO4	291.924	4.64754	53.6124
m292_C4H7INO6	291.932	5.86816	58.7873
m292_IC8H7NO3	291.948	2.60858	42.0249
m292_C9H9IO3	291.96	5.08421	55.6387
m292_IC5H11NO5	291.969	1.01065	32.6018
m292_IC9H11NO2	291.984	2.77653	43.0454
m293_C3H4INO7	292.904	1.64272	36.0063
m293_C4H6IO7	292.916	3.34158	46.2361
m293_C8H6IO4	292.932	2.83644	43.2015
m293_C4H8INO6	292.94	0.797043	31.3087
m293_C5H10IO6	292.953	2.70375	42.3896
m293_IC9H10O3	292.968	4.47208	52.458
m293_C10H14IO2	293.004	5.82782	58.3213
m294_C3H3IO8	293.888		14.9575
m294_C3H5INO7	293.912	3.53343	47.1155
m294_C4H7IO7	293.924	5.40858	56.4461
m294_C4H9INO6	293.948	3.21497	45.2432
m294_C5H11IO6	293.961	6.3805	59.8577
m294_C5H13INO5	293.984	1.58922	35.4956
m294_C6H15IO5	293.997	6.03595	58.7463
m295_C2H2INO8	294.883	5.09389	54.8464
m295_C3H4IO8	294.896	0.777262	30.8903
m295_C7H4IO5	294.911	5.30762	55.7446
m295_C3H6INO7	294.919	-0.736063	24.2842
m295_C4H8IO7	294.932	4.77389	53.3854
m295_IC8H8O4	294.947	1.95168	37.4351
m295_C4H10INO6	294.956	3.9495	49.188
m295_C5H12IO6	294.968	3.73819	48.017
m295_IC9H12O3	294.984	-1.22137	22.6695
m295_C5H14INO5	294.992	-4.53275	16.7845
m295_IC10H16O2	295.02	4.87331	53.8214
m296_IC3H4ClNO5	295.883	5.16038	54.8431
m296_IC3H5SO6	295.886	4.24155	50.4948
m296_C3H7INO7	295.927	11.3433	65.936
m296_IC7H7NO4	295.943	5.95384	57.8708
m296_C8H9IO4	295.955	11.9279	66.132
m296_C8H11INO3	295.979	5.99937	58.0142
m297_IC3H5ClNO5	296.891	3.61457	46.8381
m297_C6H4INO5	296.914	7.05497	60.7231
m297_C7H6IO5	296.927	4.61858	52.0899
m297_IC8H10O4	296.963	7.03758	60.666
m298_C2H5INO8	297.907	3.75038	47.3359
m298_IC7H7SO3	297.917	3.76207	47.3976
m298_C6H5INO5	297.922	6.43827	58.7794
m298_IC7H9NO4	297.958	4.81234	52.7053
m298_C8H13INO3	297.995	4.0787	49.081
m298_C9H17INO2	298.031	4.31826	50.3058
m299_C6H4IO6	298.906	3.62636	46.394
m299_IC7H8SO3	298.924	5.30425	54.5418
m299_C6H6INO5	298.93	3.80944	47.3946
m299_IC7H8O5	298.942	6.56664	58.8155
m299_C7H10INO4	298.966	6.54456	58.7465
m299_C8H12IO4	298.979	7.4236	60.8501
m299_C9H16IO3	299.015	4.42438	50.5637
m299_IC10H20O2	299.051	7.15521	60.2514
m300_IC6H5SO4	299.896	6.55717	58.4809
m300_IC6H7NO5	299.937	5.38654	54.565
m300_C7H11INO4	299.974	5.75089	55.9174
m300_C8H15INO3	300.01	3.65525	46.2716
m301_C5H4INO6	300.909	9.3275	62.9049
m301_C6H6IO6	300.921	3.24723	43.7546
m301_IC10H6O3	300.937	4.28799	49.3547
m301_C6H8INO5	300.945	2.13013	37.2636
m301_IC7H10O5	300.958	6.21342	57.1376
m301_C7H12INO4	300.982	4.72493	51.4364
m301_C8H14IO4	300.994	4.17973	48.7933
m301_IC10H22O2	301.067	1.35645	32.8837
m302_C5H3IO5S	301.875	7.0011	58.9599
m302_C5H5INO6	301.917	5.46034	54.2479
m302_C9H5INO3	301.932	2.51101	39.263
m302_C6H9INO5	301.953	6.17953	56.7144
m302_C10H9INO2	301.968	5.3949	53.9804
m302_C7H13INO4	301.989	6.82196	58.4896
m302_C11H13INO	302.005	2.21369	37.5237
m302_C8H17INO3	302.026	6.19674	56.744
m303_C5H4IO5S	302.883		14.2412
m303_H4IN2O9	302.897		14.2401
m303_C5H4IO7	302.901		14.2398
m303_IC9H4O4	302.916	8.42513	61.1789
m303_C6H8IO6	302.937	2.33689	38.0344
m303_IC10H8O3	302.952	0.255314	27.1182
m303_C6H10INO5	302.961	5.82259	55.2329
m303_C7H12IO5	302.973	4.04483	47.564
m303_C7H14INO4	302.997	4.2648	48.6681
m303_C8H16IO4	303.01	5.68264	54.7289
m303_IC9H20O3	303.046	4.32903	48.971
m304_C8H3INO4	303.911	3.52483	44.5541
m304_C5H7INO6	303.932	3.32694	43.4573
m304_C9H7INO3	303.948	7.65952	59.6189
m304_C6H11INO5	303.969	7.6789	59.6466
m304_C7H15INO4	304.005	2.28239	37.4899
m305_C4H4INO7	304.904	0.662403	28.6725
m305_C5H6IO7	304.916	2.11391	36.3365
m305_C5H8INO6	304.94	6.86943	57.6228
m305_IC6H10O6	304.953	2.2026	36.8313
m305_IC10H10O3	304.968	-0.732405	22.981
m305_C6H12INO5	304.977	2.41653	38.0438
m305_C7H14IO5	304.989	-1.4619	20.7757
m305_C7H16INO4	305.013	11.1109	62.5878
m305_C8H18IO4	305.026	5.13639	52.022
m306_C4H5INO7	305.912	4.85828	50.5877
m306_C8H5INO4	305.927	-0.60717	23.2805
m306_C5H9INO6	305.948	4.75668	50.1323
m306_C9H9INO3	305.963	4.09274	46.9884
m306_C10H13INO2	306	1.35623	31.9642
m307_C3F5HIO3	306.89	0.4294	27.2704
m307_C8H4IO5	306.911	6.9954	57.2532
m307_IC9H8O4	306.947	7.7546	58.7489
m307_IC6H12O6	306.968	2.3535	37.2461
m307_IC10H12O3	306.984	3.91444	45.8057
m307_IC11H16O2	307.02	5.23479	51.8073
m308_C7H3INO5	307.906	10.0153	60.9448
m308_C8H7INO4	307.943	7.69586	58.3006
m308_C5H11INO6	307.964	6.20526	54.8416
m308_C9H11INO3	307.979	4.02129	46.0746
m308_IC10H15NO2	308.015	5.59785	52.8532
m309_C3H6IN2O3S2	308.887	4.13105	46.3663
m309_C3H4INO8	308.899	6.90539	56.3715
m309_C4H6IO8	308.911	3.51858	43.2267
m309_C8H6IO5	308.927	3.10114	40.966
m309_C4H8INO7	308.935	2.39788	37.058
m309_C5H10IO7	308.948	-0.556898	23.0388
m309_C9H10IO4	308.963	2.42865	37.2232
m309_C5H12INO6	308.971	2.88418	39.7578
m309_C9H12INO3	308.987	1.74459	33.4541
m309_IC10H14O3	308.999	2.24254	36.18
m309_IC11H18O2	309.036	4.20014	46.6608
m310_C7H5INO5	309.922	6.96858	56.1677
m310_C8H7IO5	309.934	4.6802	48.6188
m310_C8H9INO4	309.958	5.41947	51.5972
m310_C9H11IO4	309.971	3.5636	43.1872
m310_C9H13INO3	309.995	-1.50961	20.0428
m311_C2H4IN2O8	310.902	4.68784	48.3659
m311_IC6H4N2O5	310.917	5.0836	50.0129
m311_IC8H8O5	310.942	5.34574	51.0159
m311_IC9H12O4	310.979	6.70363	55.1838
m311_IC10H16O3	311.015	2.78194	38.706
m311_IC11H20O2	311.051	5.1443	50.2115
m312_IC7H5SO4	311.896	5.39114	50.8845
m312_IC7H7NO5	311.937	4.034	45.0409
m312_IC8H11NO4	311.974	5.28527	50.4671
m312_IC9H15NO3	312.01	5.20597	50.1544
m312_C10H19INO2	312.047	2.93789	39.3098
m313_C7H6IO6	312.921	5.43112	50.7065
m313_IC8H10O5	312.958	7.3522	55.9212
m313_IC9H14O4	312.994	7.28421	55.7759
m313_IC10H18O3	313.031	-2.79548	17.0839
m313_IC11H22O2	313.067	5.30537	50.2006
m314_C2H5INO7S	313.884	9.23856	58.1565
m314_IC7H7SO4	313.912	3.04125	39.409
m314_C6H5INO6	313.917	6.20823	52.8848
m314_C7H7IO6	313.929	4.45213	46.4327
m314_C7H9INO5	313.953	6.03257	52.3588
m314_C8H11IO5	313.966	2.89111	38.5911
m314_C8H13INO4	313.989	3.32707	40.9018
m314_C9H15IO4	314.002	4.47454	46.5117
m315_C6H4IO7	314.901	8.41773	56.9084
m315_C7H8IO6	314.937	5.31297	49.6421
m315_IC8H12O5	314.973	8.26936	56.69
m315_IC9H16O4	315.01	7.92989	56.1921
m316_C6H7INO6	315.932	3.10378	39.2374
m316_C10H7INO3	315.948	7.39677	54.9606
m316_C7H11INO5	315.969	4.60651	46.5107
m316_C8H15INO4	316.005	4.75969	47.1473
m317_C6H6IO7	316.916	3.4032	40.5383
m317_IC7H10O6	316.953	7.63623	55.0312
m317_IC8H14O5	316.989	8.08258	55.7104
m317_IC9H18O4	317.026	4.77917	46.9205
m318_C5H5INO7	317.912	0.580804	26.1127
m318_C9H5INO4	317.927	8.31833	55.6919
m318_IC6H9NO6	317.948	4.68117	46.2372
m318_C10H9INO3	317.963	6.12263	51.2971
m318_C7H13INO5	317.984	2.31318	34.5732
m318_C11H13INO2	318	7.45627	54.3486
m318_C5H19IO7	318.018		12.9851
m318_C8H17INO4	318.021	2.27764	34.3784
m319_IC5H4O8	318.896	4.32087	44.4029
m319_C9H4IO5	318.911	6.61995	52.2838
m319_IC6H8O7	318.932	4.72517	46.1243
m319_C10H8IO4	318.947	-0.542996	21.6823
m319_C7H12IO6	318.968	4.90792	46.8496
m319_IC11H12O3	318.984	6.836	52.7601
m319_C8H16IO5	319.005	7.99827	54.8681
m319_IC12H16O2	319.02	2.80049	36.8901
m319_C9H20IO4	319.041	3.20171	38.9613
m320_C8H3INO5	319.906	4.5773	45.218
m320_C5H7INO7	319.927	1.36617	29.3566
m320_C9H7INO4	319.943	5.26066	47.8787
m320_C6H11INO6	319.964	6.89145	52.5448
m320_C10H11INO3	319.979	4.08804	43.0392
m320_C7H15INO5	320		12.8183
m320_IC11H15NO2	320.015	4.10356	43.1002
m320_C13H23IN	320.088	8.83624	55.504
m321_C4H4INO8	320.899	7.10432	52.6657
m321_C5H6IO8	320.911	4.41109	44.2127
m321_C9H6IO5	320.927	6.22379	50.5907
m321_C10H10IO4	320.963	4.43176	44.2867
m321_IC11H14O3	320.999	2.03704	32.4818
m321_C8H18IO5	321.02		12.7324
m321_IC12H18O2	321.036	2.08541	32.7208
m322_C8H5INO5	321.922	-3.59761	15.1157
m322_C5H9INO7	321.943	0.095828	23.4919
m322_C9H9INO4	321.958	9.81988	55.6377
m322_C10H13INO3	321.995	2.40452	34.1429
m322_IC11H17NO2	322.031	3.16016	37.9924
m322_C12H21INO	322.067	4.64645	44.8617
m323_C8H4IO6	322.906	9.06466	54.6955
m323_C9H8IO5	322.942	5.92595	49.0831
m323_IC10H12O4	322.979	4.15262	42.481
m323_IC11H16O3	323.015	3.82893	40.9907
m323_IC12H20O2	323.051	2.48781	34.3271
m324_C8H5IO6	323.914	6.794	50.9719
m324_C8H7INO5	323.937	6.04272	49.0899
m324_C9H9IO5	323.95	4.36842	43.1436
m324_C5H11INO7	323.959	5.63386	47.8615
m324_C9H11INO4	323.974	4.4758	43.5905
m324_C10H13IO4	323.986	5.38003	47.0195
m324_C10H15INO3	324.01	5.19611	46.3722
m324_C11H19INO2	324.047	2.32506	33.2751
m324_C12H23INO	324.083	4.1011	41.9378
m325_C8H6IO6	324.921	9.13126	54.0169
m325_C5H10IO8	324.943	5.13442	45.8607
m325_IC9H10O5	324.958	6.57376	50.1149
m325_C10H14IO4	324.994	7.44068	51.8584
m325_C11H18IO3	325.031	5.99586	48.5967
m326_IC8H7SO4	325.912	3.32257	37.8031
m326_C3H7IN2O8	325.925	5.54351	46.9413
m326_C8H9INO5	325.953	-0.516037	20.7763
m326_C9H11IO5	325.966	6.58393	49.7962
m326_C9H13INO4	325.989	-0.112344	22.112
m326_C10H15IO4	326.002	2.10397	31.7384
m326_C10H17INO3	326.026	2.74971	34.9511
m326_C11H19IO3	326.038	-1.18226	18.8643
m326_C11H21INO2	326.062	1.71699	29.8349
m327_C3H4IO8S	326.868	3.84432	40.0037
m327_IC4H8SO7	326.904	1.58294	29.0256
m327_C3H6INO9	326.909	3.76103	39.6114
m327_C7H6INO6	326.925	-3.4003	14.8262
m327_C8H8IO6	326.937	4.72645	43.7226
m327_C8H10INO5	326.961	3.41836	37.9914
m327_C9H12IO5	326.973	2.58669	33.9165
m327_C9H14INO4	326.997	4.38787	42.3394
m327_IC10H16O4	327.01	2.67748	34.3585
m327_C10H18INO3	327.034	5.44294	46.2619
m327_C11H20IO3	327.046	-0.981625	19.263
m327_C12H24IO2	327.083	7.0304	50.3714
m328_C6H5IN2O6	327.92	3.91897	40.0504
m328_C7H7INO6	327.932	1.80698	29.8836
m328_C8H9IO6	327.945	1.64846	29.1269
m328_C7H9IN2O5	327.956	7.83468	51.4356
m328_C8H11INO5	327.969	-0.134788	21.7362
m328_C9H13IO5	327.981	2.90471	35.2458
m328_C9H15INO4	328.005	1.51281	28.4786
m328_C10H17IO4	328.018		12.144
m329_C7H6IO7	328.916	2.72824	34.1574
m329_C7H8INO6	328.94	6.5811	48.7802
m329_IC8H10O6	328.953	5.2717	45.0872
m329_C12H10IO3	328.968	3.38665	37.319
m329_C8H12INO5	328.977	1.70741	29.1968
m329_C9H14IO5	328.989	6.38271	48.2961
m329_C10H18IO4	329.026	6.05532	47.4435
m330_C6H5INO7	329.912		11.9852
m330_C7H7IO7	329.924	4.01665	39.9243
m330_C7H9INO6	329.948	1.11867	26.3285
m330_C8H11IO6	329.961	3.44849	37.3508
m330_C8H13INO5	329.984	0.823135	25.0604
m330_C9H15IO5	329.997	8.09568	51.0671
m330_C9H17INO4	330.021	3.34085	36.8314
m330_C10H19IO4	330.033	3.77681	38.8344
m330_C10H21INO3	330.057	6.70435	48.6751
m331_C10H4IO5	330.911	8.6499	51.3801
m331_C7H8IO7	330.932	7.19717	49.3533
m331_IC8H12O6	330.968	7.45569	49.787
m331_C9H16IO5	331.005	0.0819619	22.03
m331_C10H20IO4	331.041	1.57709	28.1765
m332_C5H3INO8	331.891		11.8198
m332_C6H5IO8	331.903		11.8188
m332_C5H5IN2O7	331.915	11.0915	52.5723
m332_C6H7INO7	331.927	6.30659	47.1285
m332_C7H9IO7	331.94	4.3527	40.7646
m332_C6H9IN2O6	331.951	0.926123	25.1434
m332_C7H11INO6	331.964	6.56884	47.7306
m332_C8H13IO6	331.976	4.66485	41.9814
m332_C8H15INO5	332	4.9883	43.1641
m332_C9H17IO5	332.013	3.3148	36.1986
m332_C9H19INO4	332.036	0.210938	22.3314
m332_IC10H21O4	332.049	6.23793	46.9184
m333_C5H4INO8	332.899	2.83419	33.7187
m333_C6H6IO8	332.911	-2.02847	16.1793
m333_C5H6IN2O7	332.923	5.02521	43.0125
m333_IC7H10O7	332.948	5.6529	45.03
m333_C11H10IO4	332.963	1.02348	25.3711
m333_C8H14IO6	332.984	2.93455	34.1731
m333_IC12H14O3	332.999	5.87239	45.6431
m333_C9H18IO5	333.02	2.99609	34.4544
m333_IC13H18O2	333.036	4.08805	39.3608
m333_IC10H22O4	333.057	4.66842	41.6749
m333_IC11H26O3	333.093	4.16749	39.6764
m334_C5H3IO7S	333.865	10.7092	51.7029
m334_C5H5INO8	333.907	-0.297142	20.3249
m334_C6H7IO8	333.919	4.96078	42.4835
m334_C6H9INO7	333.943	2.42709	31.5465
m334_C7H11IO7	333.956	5.31892	43.6795
m334_C7H13INO6	333.979	6.66315	47.2576
m334_C8H15IO6	333.992	-0.944789	18.444
m334_C8H17INO5	334.016	6.09673	45.9121
m334_C9H19IO5	334.028	4.25846	39.7853
m335_C5H4IO9	334.891	-1.11719	17.8892
m335_C5H6INO8	334.914	6.75809	47.1411
m335_C6H8IO8	334.927	7.10233	47.8039
m335_C10H8IO5	334.942	0.365155	22.4319
m335_C6H10INO7	334.951	3.26135	35.2058
m335_C7H12IO7	334.963	5.46264	43.8166
m335_IC11H12O4	334.979	6.5267	46.6242
m335_C7H14INO6	334.987	-4.71147	12.9359
m335_C8H16IO6	335	2.8719	33.3931
m335_C13H20IO2	335.051	2.38252	31.0885
m336_C4H3INO9	335.886		11.4878
m336_C5H5IO9	335.898		11.4868
m336_C9H5IO6	335.914		11.4855
m336_C5H7INO8	335.922	8.21614	49.1099
m336_C6H9IO8	335.935	-2.14865	15.6225
m336_C10H9IO5	335.95	3.17161	34.5454
m336_C6H11INO7	335.959	3.75117	37.1242
m336_C7H13IO7	335.971	3.64695	36.668
m336_C11H13IO4	335.986		11.4795
m336_C7H15INO6	335.995		11.4788
m336_C8H17IO6	336.008	10.58	50.8601
m336_C8H19INO5	336.031		11.4758
m336_C9H21IO5	336.044	3.93174	37.8716
m337_C4H4INO9	336.894	-4.00365	13.259
m337_C8H4INO6	336.909	5.39161	42.9892
m337_C9H6IO6	336.921	6.43621	45.7746
m337_C5H8INO8	336.93	0.391694	22.2094
m337_IC6H10O8	336.943	4.36627	39.3849
m337_C10H10IO5	336.958	5.07289	41.9468
m337_C6H12INO7	336.966	2.87799	32.9512
m337_IC7H14O7	336.979	3.68548	36.5689
m337_IC11H14O4	336.994	1.4412	26.4111
m337_C7H16INO6	337.003	4.03975	38.0585
m337_IC12H18O3	337.031	-0.864217	18.2544
m337_C13H22IO2	337.067	1.55144	26.8778
m338_C8H5INO6	337.917	4.81795	40.7811
m338_C5H9INO8	337.938	3.21497	34.2468
m338_C6H11IO8	337.95	6.68719	45.9744
m338_C6H13INO7	337.974	-0.530638	19.0443
m338_C7H15IO7	337.987		11.3144
m338_C11H17INO3	338.026	1.80975	27.8304
m338_C12H21INO2	338.062	1.26382	25.4523
m338_IC13H25NO	338.099	4.48388	39.5057
m339_IC5H8SO7	338.904		11.2391
m339_C4H6INO9	338.909		11.2386
m339_C5H8IO9	338.922	3.51211	35.3099
m339_C9H8IO6	338.937	5.77346	43.4647
m339_C9H10INO5	338.961	3.99153	37.3239
m339_C10H12IO5	338.973	6.51511	45.2701
m339_C6H14INO7	338.982	2.13626	29.0989
m339_C15H16IO	339.025	2.7676	31.9604
m339_C13H24IO2	339.083	4.93956	40.8562
m340_C8H7INO6	339.932	4.63574	39.5382
m340_IC5H11NO8	339.953	0.498742	22.1114
m340_C9H11INO5	339.969	3.69835	35.835
m340_C13H11INO2	339.984	0.296512	21.3846
m340_C10H15INO4	340.005	3.02751	32.9
m340_IC11H19NO3	340.042	3.78121	36.1637
m340_C12H23INO2	340.078	6.12114	44.0003
m341_C3H4INO10	340.889	6.19609	43.9189
m341_C4H6IO10	340.901	6.17834	43.8725
m341_C4H8INO9	340.925	-2.28194	14.8495
m341_C8H8INO6	340.94	5.73411	42.7238
m341_C9H10IO6	340.953	6.16994	43.8358
m341_C9H12INO5	340.977	3.15	33.2076
m341_C10H14IO5	340.989	8.53151	47.6671
m341_C11H18IO4	341.026	8.64024	47.761
m341_IC12H22O3	341.062	7.39387	46.1998
m341_C13H26IO2	341.098	8.51857	47.6158
m342_C8H7IO5S	341.906	6.63944	44.5631
m342_IC5H11SO7	341.928	2.77767	31.3304
m342_C8H9INO6	341.948	3.38816	34.0036
m342_IC9H13NO5	341.984	7.85095	46.5386
m342_IC10H15O5	341.997	2.62179	30.6202
m342_C10H17INO4	342.021	6.90644	45.0445
m342_C11H21INO3	342.057	4.14833	37.103
m342_C12H25INO2	342.094	5.11893	40.5466
m343_C7H6INO7	342.919	4.69378	38.8803
m343_C8H8IO7	342.932		10.9105
m343_IC5H12SO7	342.935	4.7132	38.9435
m343_C12H8IO4	342.947	3.90588	35.9016
m343_C8H10INO6	342.956	0.587961	21.9478
m343_C9H12IO6	342.968	5.0701	40.1286
m343_C9H14INO5	342.992	-4.25289	12.4942
m343_C10H16IO5	343.005	4.75675	39.0743
m343_C11H20IO4	343.041	-2.69494	14.026
m343_C12H24IO3	343.078	4.25889	37.2474
m343_C13H28IO2	343.114	8.17263	46.542
m344_C7H5IO8	343.903		10.832
m344_C7H7INO7	343.927	-3.10044	13.4401
m344_C8H9IO7	343.94	5.98219	42.4234
m344_C8H11INO6	343.964	1.98287	27.3828
m344_C9H13IO6	343.976	2.56976	29.9448
m344_C9H15INO5	344	1.74937	26.375
m344_C10H17IO5	344.013	5.30164	40.5348
m344_C10H19INO4	344.036	1.72784	26.2765
m344_C11H23INO3	344.073	2.8383	31.1004
m345_IC6H4NSO6	344.881	8.48712	46.2657
m345_C6H4INO8	344.899		10.7518
m345_C7H6IO8	344.911	8.03255	45.7602
m345_C11H6IO5	344.927	3.00008	31.6033
m345_C8H10IO7	344.948	5.4502	40.6876
m345_C8H12INO6	344.971	4.12214	36.2068
m345_C9H14IO6	344.984	5.53499	40.917
m345_C10H18IO5	345.02	5.80702	41.6398
m345_C11H22IO4	345.057	3.7871	34.8675
m345_C12H26IO3	345.093	9.43612	46.9705
m346_C5H3IN2O8	345.894		10.6719
m346_C6H5INO8	345.907		10.6708
m346_C7H7IO8	345.919		10.6698
m346_C6H7IN2O7	345.93	6.59198	43.1519
m346_C7H9INO7	345.943	2.75164	30.2942
m346_C8H11IO7	345.956	3.08489	31.7229
m346_C8H13INO6	345.979	3.38202	32.9713
m346_C9H15IO6	345.992	4.2632	36.4612
m346_C9H17INO5	346.016	6.4249	42.7793
m346_C10H19IO5	346.028	4.87691	38.6015
m346_IC10H21NO4	346.052	3.88661	35.0028
m346_C11H25INO3	346.088	4.99593	38.9694
m347_C6H4IO7S	346.873	-3.55221	12.693
m347_C6H4IO9	346.891	0.686476	21.6618
m347_C6H6INO8	346.914	1.03991	22.9677
m347_C7H8IO8	346.927	1.55764	25.013
m347_C7H10INO7	346.951	5.99373	41.5047
m347_IC8H12O7	346.963	4.74898	37.9078
m347_C8H14INO6	346.987	-0.116089	18.9946
m347_C9H16IO6	347	2.15201	27.4842
m347_IC10H20O5	347.036	4.76496	37.9405
m347_C11H24IO4	347.072		10.5777
m348_C5H3INO9	347.886		10.5129
m348_C6H5IO9	347.898	2.34574	28.1208
m348_C10H5IO6	347.914	-8.35634	10.7492
m348_C6H7INO8	347.922		10.51
m348_C7H9IO8	347.935	1.17205	23.2968
m348_C11H9IO5	347.95	7.27966	43.7098
m348_C7H11INO7	347.959	6.8844	43.0479
m348_C8H13IO7	347.971	1.24183	23.5611
m348_C8H15INO6	347.995	4.32547	36.1416
m348_C9H17IO6	348.008	2.5535	28.9826
m348_C9H19INO5	348.031	1.99103	26.5932
m348_C10H21IO5	348.044		10.5004
m349_C4H2IN2O9	348.881	-2.16892	14.1629
m349_C5H4INO9	348.894		10.433
m349_C6H6IO9	348.906	9.16769	45.4557
m349_C10H6IO6	348.921	5.78969	40.3899
m349_C10H8INO5	348.945	4.18678	35.378
m349_C11H10IO5	348.958	4.40603	36.1664
m349_C9H18IO6	349.015	1.88051	25.9375
m349_IC13H18O3	349.031	5.68894	40.0979
m350_C5H5INO9	349.901	1.07399	22.5816
m350_C6H7IO9	349.914	7.54113	43.4443
m350_C6H9INO8	349.938	4.29011	35.4865
m350_C10H9INO5	349.953	2.19235	27.0445
m350_C11H11IO5	349.966	1.43124	23.9436
m350_IC7H13NO7	349.974	9.49522	45.309
m350_C11H13INO4	349.989		10.3465
m350_C12H15IO4	350.002		10.3456
m350_C8H17INO6	350.011		10.3449
m350_IC12H17NO3	350.026		10.3437
m350_C13H21INO2	350.062	7.93544	43.902
m350_IC14H25NO	350.099	1.58129	24.5137
m351_C5H4IO10	350.885		10.2762
m351_C9H4IO7	350.901	1.54662	24.227
m351_C9H6INO6	350.925	6.96178	42.2224
m351_C10H8IO6	350.937	7.61193	43.2031
m351_C10H10INO5	350.961	3.86214	33.6325
m351_C11H12IO5	350.973	3.98203	34.0819
m351_C11H14INO4	350.997	0.891607	21.7253
m351_C12H16IO4	351.01	5.17684	38.0882
m351_C9H20IO6	351.031	3.14819	30.7861
m351_C13H20IO3	351.046	4.43038	35.6809
m351_C14H24IO2	351.083	7.30811	42.7247
m352_C5H7INO9	351.917		10.1955
m352_C6H9IO9	351.93	4.33339	35.1037
m352_C6H11INO8	351.953		10.1927
m352_C7H13IO8	351.966	1.92308	25.5331
m352_C7H15INO7	351.99	6.01362	39.9924
m352_C8H17IO7	352.002		10.1888
m352_C8H19INO6	352.026	1.0125	21.9927
m352_C9H21IO6	352.039	2.2242	26.7484
m353_C4H4INO10	352.889	5.22704	37.6894
m353_C5H6IO10	352.901	6.95794	41.5823
m353_C9H6IO7	352.916		10.1177
m353_IC6H10SO7	352.92		10.1175
m353_C5H8INO9	352.925	-0.962215	15.9847
m353_C6H10OIO8	352.938	8.94795	43.9168
m353_C7H14IO6S	352.956	5.92238	39.485
m353_C11H14IO5	352.989	2.70094	28.5081
m353_IC12H18O4	353.026	3.38139	31.2507
m353_C13H22IO3	353.062	0.509108	20.0707
m353_C14H26IO2	353.098	9.20303	44.0494
m354_C5H9INO9	353.933	4.01277	33.4302
m354_C6H11IO9	353.945	3.16579	30.1766
m354_C6H13INO8	353.969	2.76846	28.5688
m354_C6H15IN2O7	353.993	2.04045	25.609
m355_C4H6INO10	354.904		9.96425
m355_C5H8IO10	354.917	2.95074	29.0942
m355_C5H10INO9	354.941	4.78771	35.7919
m355_C6H12IO9	354.953	5.03247	36.5335
m355_C10H12IO6	354.968	5.81197	38.6178
m355_C10H14INO5	354.992	4.455	34.6996
m355_IC11H16O5	355.005	4.21534	33.8756
m355_C12H20IO4	355.041	5.85268	38.6933
m355_IC13H24O3	355.078	6.12635	39.305
m355_C14H28IO2	355.114		9.94814
m356_IC9H9SO5	355.922	4.09995	33.232
m356_C9H11INO6	355.964	4.6613	35.1124
m356_C6H15INO8	355.985	5.39023	37.2485
m356_C10H15INO5	356	6.91976	40.5388
m357_C8H8INO7	356.935	3.64602	31.3254
m357_C9H10IO7	356.948	6.92933	40.2585
m357_C10H14IO6	356.984	8.01157	41.7134
m357_C11H18IO5	357.02	2.61241	27.2836
m357_C12H22IO4	357.057	7.14128	40.5595
m357_C13H26IO3	357.093	4.43161	34.0634
m358_IC9H11SO5	357.938		9.73315
m358_C8H9INO7	357.943		9.73276
m358_C9H11IO7	357.956	6.44406	39.0837
m358_C9H13INO6	357.979	5.03234	35.6878
m358_C10H15IO6	357.992	5.2445	36.2817
m358_C10H17INO5	358.016	7.91347	41.2725
m359_C7H4IO9	358.891	0.924422	20.5548
m359_C7H6INO8	358.914	1.59206	22.9453
m359_C8H8IO8	358.927	2.60928	26.8706
m359_C9H12IO7	358.963	8.12315	41.1953
m359_C9H14INO6	358.987	-2.54593	12.6009
m359_C10H16IO6	359	2.09637	24.8524
m359_C11H20IO5	359.036	5.30655	36.156
m360_C8H9IO8	359.935	6.06785	37.7284
m360_C8H11INO7	359.959	6.82393	39.1555
m360_C9H13IO7	359.971	5.14672	35.4603
m360_C9H15INO6	359.995	4.27378	32.7857
m360_C10H17IO6	360.008	5.27129	35.7896
m360_C10H19INO5	360.031	0.998976	20.6272
m360_C11H21IO5	360.044	5.1927	35.5667
m361_C6H4INO9	360.894	2.5926	26.3978
m361_C7H6IO9	360.906	3.08159	28.2724
m361_C7H8INO8	360.93	5.79832	36.8408
m361_C8H10IO8	360.943	4.09678	31.9503
m361_C8H12INO7	360.966	2.15978	24.7169
m361_C9H14IO7	360.979	6.44151	38.17
m361_C9H16INO6	361.003	1.1979	21.1587
m361_C10H18IO6	361.015	8.14717	40.5663
m361_C10H20INO5	361.039	5.1199	35.0924
m362_C7H9INO8	361.938	5.41672	35.6314
m362_C8H11IO8	361.95	5.87116	36.713
m362_C8H13INO7	361.974	-1.12539	14.5665
m362_C9H15IO7	361.987	-0.695187	15.4873
m362_C9H17INO6	362.011	3.77571	30.5745
m362_C10H19IO6	362.023	2.22875	24.7759
m363_C6H6INO9	362.909	1.78166	22.9338
m363_C7H8IO9	362.922	3.27614	28.5543
m363_C7H10INO8	362.946	2.46025	25.4751
m363_C8H12IO8	362.958	4.34276	32.2589
m363_C8H14INO7	362.982	4.46638	32.6457
m363_C9H16IO7	362.995	4.49	32.7166
m363_C9H18INO6	363.018	0.161193	17.5509
m363_C10H20IO6	363.031		9.35427
m364_C7H9IO9	363.93	1.69407	22.4324
m364_C7H11INO8	363.953	3.00014	27.3036
m364_C8H13IO8	363.966	3.36611	28.6503
m364_C8H15INO7	363.99		9.28429
m364_C9H17IO7	364.002		9.28337
m364_C9H19INO6	364.026		9.28164
m364_C10H21IO6	364.039	4.54156	32.6092
m365_C5H4INO10	364.889	-4.49509	10.4252
m365_C6H6IO10	364.901	5.66027	35.3994
m365_C6H8INO9	364.925	7.32433	38.3984
m365_C7H10IO9	364.938	2.70307	25.9885
m365_C7H12INO8	364.961	4.71078	32.8811
m365_C8H14IO8	364.974	6.20368	36.5442
m365_C8H16INO7	364.998	4.45338	32.0939
m365_C9H18IO7	365.01	4.3806	31.8636
m365_C9H20INO6	365.034	4.99263	33.6661
m365_C10H22IO6	365.047	3.16568	27.6798
m366_IC6H9NO9	365.933	5.01534	33.4916
m366_C7H11IO9	365.945	9.89716	40.2384
m366_C7H13INO8	365.969	3.04356	27.0344
m366_C8H15IO8	365.982	2.49699	25.0121
m366_C9H19IO7	366.018	3.13452	27.3562
m366_C10H23IO6	366.054	5.39309	34.4421
m367_C9H4IO8	366.896	-1.98346	12.5763
m367_C6H8IO10	366.917	-2.39637	12.0227
m367_C10H8IO7	366.932	4.55234	31.9093
m367_C11H12IO6	366.968	9.06244	39.4518
m367_C12H16IO5	367.005	5.10017	33.4378
m367_C13H20IO4	367.041	3.93678	29.9338
m367_C14H24IO3	367.078	5.73633	34.9712
m368_C5H7INO10	367.912	3.46129	28.1104
m368_C6H11INO9	367.948	2.2959	23.895
m368_C7H13IO9	367.961	2.10174	23.1882
m368_C7H15INO8	367.985		8.99755
m369_C6H10IO10	368.932	1.09297	19.54
m369_C6H12INO9	368.956	-0.994817	14.0428
m369_C10H12INO6	368.971	3.66632	28.5805
m369_C11H14IO6	368.984	2.13547	23.1233
m369_C7H16INO8	368.993	7.9478	37.9101
m369_C11H16INO5	369.008	5.3214	33.4763
m369_C12H18IO5	369.02	2.40628	24.0932
m369_C13H22IO4	369.057	4.89633	32.3578
m369_C14H26IO3	369.093	3.58427	28.2737
m370_IC8H5NO8	369.907	-7.23651	9.19836
m370_IC9H9NO7	369.943	4.9055	32.1577
m370_C6H13INO9	369.964	7.23471	36.7896
m370_IC10H13NO6	369.979	8.8726	38.4007
m370_C7H17INO8	370	4.77849	31.794
m370_C12H19IO5	370.028	4.12164	29.8307
m371_C9H8IO8	370.927	1.61026	20.9453
m371_C9H10INO7	370.951	3.56752	27.8066
m371_C10H12IO7	370.963	4.70427	31.3468
m371_C10H14INO6	370.987	6.35101	35.1265
m372_C9H11INO7	371.959	6.76598	35.548
m372_C10H13IO7	371.971	1.38399	20.0186
m372_C10H15INO6	371.995	3.64943	27.8519
m372_C11H17IO6	372.008	1.21885	19.4746
m372_C11H19INO5	372.031	8.64703	37.6225
m373_C9H10IO8	372.943	3.41981	26.8788
m373_C9H12INO7	372.966	5.00158	31.6522
m373_C10H14IO7	372.979	6.52458	34.8771
m373_C10H16INO6	373.003	-5.48986	9.37354
m374_C8H9INO8	373.938	3.81106	27.9519
m374_C9H11IO8	373.95	6.81146	35.063
m374_C9H13INO7	373.974	6.72959	34.932
m374_C10H17INO6	374.011	6.83542	35.0821
m374_C11H19IO6	374.023	0.214428	16.2355
m374_C11H21INO5	374.047	6.79302	35.0086
m375_C11H4IO7	374.901	3.75459	27.5604
m375_C8H8IO9	374.922		8.51908
m375_C12H8IO6	374.937	5.41359	32.1628
m375_C9H12IO8	374.958	5.71185	32.8151
m375_C13H12IO5	374.973	5.61613	32.6061
m375_C10H16IO7	374.995	0.875201	17.9665
m375_C14H16IO4	375.01	0.994381	18.3238
m375_C11H20IO6	375.031	3.11944	25.431
m375_C15H20IO3	375.046	1.95145	21.4179
m375_C12H24IO5	375.067	-0.689613	13.9853
m376_C7H7INO9	375.917	11.9392	37.7819
m376_C8H11INO8	375.953	4.66288	30.0257
m376_C9H15INO7	375.99	3.48212	26.4457
m376_C10H19INO6	376.026	3.59343	26.8004
m376_C11H23INO5	376.063	1.03456	18.2942
m376_C12H27INO4	376.099	5.81727	32.739
m377_IC8H10O9	376.938	0.857664	17.6422
m377_C12H10IO6	376.953	4.13009	28.272
m377_C9H14IO8	376.974	5.29527	31.3792
m377_C13H14IO5	376.989	-1.03814	13.1018
m377_C13H16INO4	377.013	2.32591	22.3501
m377_C14H18IO4	377.026	4.68759	29.8399
m377_C15H22IO3	377.062	0.943207	17.8773
m378_C7H9INO9	377.933	2.94721	24.2822
m378_C8H13INO8	377.969	5.65511	31.9281
m378_C9H17INO7	378.006	3.16895	25.0061
m379_C6H4IO11	378.88	5.30667	30.9381
m379_C10H4IO8	378.896		8.25666
m379_C7H8IO10	378.917	2.05308	21.1102
m379_C11H8IO7	378.932	5.82804	32.0384
m379_C8H12IO9	378.953	4.99356	30.1746
m379_C12H12IO6	378.968	1.10968	18.1049
m379_C9H16IO8	378.99	6.23333	32.7789
m379_C13H16IO5	379.005	3.24289	25.0523
m379_C10H20IO7	379.026	3.25278	25.0804
m379_C14H20IO4	379.041	2.68581	23.2
m380_C6H7INO10	379.912	-1.69212	11.7501
m380_C10H7INO7	379.927		8.18997
m380_IC7H11NO9	379.948	2.35645	21.9411
m380_C11H11INO6	379.964	3.91228	26.9641
m380_IC8H15NO8	379.985	-0.953094	12.9508
m380_C12H15INO5	380	2.51914	22.4723
m380_C9H19INO7	380.021		8.18393
m380_C13H19INO4	380.036	2.70644	23.0876
m381_C8H14IO9	380.969	3.28818	24.8139
m381_C9H18IO8	381.005	5.90344	31.666
m381_C10H22IO7	381.042	3.98011	26.9386
m383_C6H10INO10	382.935	3.64265	25.5344
m383_C7H12IO10	382.948	0.283157	15.3055
m383_C7H14INO9	382.972	6.97584	32.8848
m385_C9H6IO9	384.906		7.87658
m385_C9H8INO8	384.93		7.87511
m385_C10H10IO8	384.943	0.837695	16.5131
m385_C6H12INO10	384.951	2.56549	21.7652
m385_C10H12INO7	384.966	-0.917078	12.5189
m385_C11H14IO7	384.979	5.86293	30.6205
m385_C11H16INO6	385.003	5.59988	30.1038
m385_C12H18IO6	385.015	7.16283	32.5979
m386_IC6H13NO10	385.959	5.02614	28.639
m386_C10H13INO7	385.974	-2.19933	10.5677
m386_C11H17INO6	386.011	4.34504	26.9207
m388_C9H11INO8	387.953	6.85784	31.4785
m388_C10H15INO7	387.99	7.40426	32.1251
m388_C11H19INO6	388.026	2.7219	21.7378
m388_C12H23INO5	388.063	6.2918	30.6274
m389_IC10H14O8	388.974	8.4591	32.8133
m390_C9H13INO8	389.969	6.49811	30.4923
m390_C10H17INO7	390.006	4.43018	26.3179
m391_IC5F9HO2	390.888	4.06888	25.1907
m391_C8H8IO10	390.917	3.98562	24.9586
m391_C9H12IO9	390.953	7.73149	31.7225
m391_C9H14INO8	390.977	3.47411	23.4989
m391_IC10H16O8	390.99	3.38247	23.2284
m391_C14H16IO5	391.005	3.87353	24.6324
m391_C15H20IO4	391.041	0.355077	14.5416
m392_C8H11INO9	391.948	7.42998	31.1835
m392_C9H15INO8	391.985	2.04393	19.0382
m392_C10H19INO7	392.021	6.46789	29.9694
m393_C10H4INO8	392.899	4.08888	24.8571
m393_C11H6IO8	392.911	3.36333	22.8319
m393_C12H10IO7	392.948	6.01544	29.049
m393_C12H12INO6	392.971	1.37079	16.9509
m393_C13H14IO6	392.984	1.9659	18.662
m393_C14H18IO5	393.02	2.34718	19.7912
m393_C15H22IO4	393.057	7.96418	31.4179
m401_IC11H14O8	400.974	9.86062	30.635
m402_IC6H13NO11	401.954	8.29505	29.6163
m402_IC12H21NO6	402.042	0.169136	12.9776
m403_C10H12O9I	402.953	4.33492	23.6321
m403_IC10H16N2O7	403.001	6.73983	27.9305
m404_C10H15INO8	403.985	6.04519	26.7752
m405_IC10H14O9	404.969	2.50642	18.526
m406_C9H13INO9	405.964	11.1732	29.8724
m406_C10H17INO8	406	1.76229	16.3833
m407_IC8H12N2O9	406.959	4.40537	23.1068
m407_IC10H16O9	406.984	6.59827	26.9517
m408_IC8H11NO10	407.943	4.03791	22.0895
m408_IC9H15NO9	407.98	3.14216	19.8198
m408_C10H19INO8	408.016	3.57424	20.9337
m414_IC11H11SO7	413.928	12.4469	28.3938
m415_IC17H20O4	415.041	5.05954	23.1202
m417_IC11H14O9	416.969	9.93083	27.3248
m419_IC10H16N2O8	418.996	9.49864	26.8023
m420_C10H15INO9	419.98	3.18968	18.3361
m420_IC11H19NO8	420.016	6.99533	25.0171
m421_IC10H16NSO7	420.97	6.04704	23.7504
m422_IC9H13NO10	421.959	-3.81047	7.06222
m422_C10H17INO9	421.995	2.82766	17.2191
m422_IC11H21NO8	422.032	4.62557	21.2372
m424_IC10H19NO9	424.011	-3.39379	7.17605
m427_C20H28IO2	427.114	6.18555	22.9898
m429_C18H6IO5	428.927	6.12372	22.6497
m429_IC18H22O4	429.057	8.57123	24.6989
m429_C20H30IO2	429.13	5.58712	21.889
m431_IC17H20O5	431.036	12.7919	25.3826
m433_IC11H14O10	432.964	-3.08458	6.95068
m433_IC10H14N2O9	432.975	6.73767	22.7715
m434_IC12H21NO8	434.032	2.72565	15.723
m435_IC10H12O11	434.943	5.04448	20.292
m435_IC10H16N2O9	434.991	6.92546	22.6763
m436_C10H15INO10	435.975	7.01081	22.6214
m437_IC10H14O11	436.959	3.43342	16.994
m437_IC10H18N2O9	437.006	1.191	12.1419
m438_IC10H17NO10	437.99	5.96991	21.2521
m440_IC10H19NO10	440.006	4.52406	18.8239
m441_C10H4INO11	440.883	3.78413	17.3307
m441_C20H26IO3	441.093	5.86583	20.7489
m444_C13H19INO8	444.016	2.20229	13.734
m449_IC10H14N2O10	448.97	10.6607	22.666
m451_IC10H16N2O10	450.986	5.71773	19.5017
m452_C10H15NO11I	451.97	1.76576	12.3001
m454_IC10H17NO11	453.985	-5.99019	5.31815
m456_IC10H19NO11	456.001	6.19863	19.5784
m456_C16H27INO6	456.089	5.26578	18.4335
m464_IC11H15NO11	463.97	6.73572	19.3943
m466_IC11H17NO11	465.985	4.48736	16.5134
m467_IC10H16N2O11	466.98	5.67719	18.0874
m470_IC17H29NO6	470.105	7.76499	19.6345
m471_IC20H24O5	471.067	2.42597	12.5359
m474_IC13H17NO10	473.99	4.54058	16.0897
m474_C16H29INO7	474.099	2.24837	12.066
m476_IC13H19NO10	476.006	11.0257	20.217
m479_IC10H10F10O2	478.957	10.1342	19.8598
m482_IC20H21NO5	482.047	2.48055	12.1626
m484_IC20H23NO5	484.063	7.56628	18.5949
m485_IC20H22O6	485.047	3.56799	13.9652
m486_IC16H23O9	486.039	9.18648	19.1829
m488_IC14H19NO10	488.006	3.39575	13.552
m488_IC15H23NO9	488.042	8.32584	18.7584
m490_C14H21INO10	490.022	2.32124	11.597
m490_IC16H29NO8	490.094	1.79074	10.6712
m491_IC7F13HO2	490.882	6.1403	17.1597
m497_C14H12INO11	496.946	9.81609	18.792
m498_IC20H21NO6	498.042	11.9072	19.0515
m500_IC20H23NO6	500.058	5.91714	16.5581
m514_IC20H21NO7	514.037	1.67872	9.94338
m516_IC20H23NO7	516.052	3.66954	13.1742
m529_IC20H22N2O7	529.048	5.4655	15.3095
m530_IC20H21NO8	530.032	7.63723	16.984
m531_IC16H24N2O10	531.048	11.6521	17.9894
m532_IC20H23NO8	532.047	9.05942	17.5105
m533_IC19H22N2O8	533.043	4.44847	14.0047
m543_IC20H20N2O8	543.027	6.19573	15.7925
m545_IC20H22N2O8	545.043	5.27647	14.8649
m547_IC20H24N2O8	547.058	9.61104	17.4115
m549_IC19H22N2O9	549.038	7.58428	16.6597
m557_IC22H26N2O7	557.079	4.07987	13.2288
m561_IC20H22N2O9	561.038	11.7008	17.5703
m562_IC20H21NO10	562.022	3.34331	12.1007
m563_IC20H24N2O9	563.053	8.1164	16.7698
m569_IC19H26N2O10	569.064	12.9093	17.5893
m571_IC19H28N2O10	571.079	9.40448	17.132
m572_IC19H27NO11	572.063	3.32335	12.0169
m573_IC18H26N2O11	573.059	7.85643	16.5839
m573_IC22H26N2O8	573.074		3.91471
m575_IC18H28N2O11	575.074	3.16586	11.7602
m577_IC20H22N2O10	577.032	4.6311	13.8508
m579_IC20H24N2O10	579.048	6.01618	15.3357
m585_IC19H26N2O11	585.059	-0.444121	6.65112
m586_IC20H29NO11	586.079	5.60257	14.9168
m587_C19H28N2O11I	587.074	-2.67963	5.02285
m587_IC20H32N2O10	587.111	-0.802752	6.30169
m589_IC18H26N2O12	589.054	-2.40717	5.15738
m589_IC22H26N2O9	589.069	-1.9279	5.43463
m591_IC18H28N2O12	591.069	1.72607	9.4549
m592_IC17H23NO14	592.017	2.94739	11.366
m593_IC20H22N2O11	593.027	3.74631	12.5811
m601_IC19H26N2O12	601.054	-0.920197	6.17935
m603_IC19H28N2O12	603.069	5.75075	15.0127
m603_IC20H32N2O11	603.106	4.04623	12.9895

## Sheet: sensitivity from calibration
ion formula	calibration factor (ncps/ppt)	under absolute humidity (mmol/mol)
m173_ICH2O2	3.71532	4
m187_IC2H4O2	0.0532992	4
m201_IC3H6O2	0.0413537	4
m215_IC4H8O2	0.0631345	4
m229_IC5H10O2	0.0844102	4
m237_IC6H6O2	38.6822	4
m199_IC3H4O2	0.0523979	4
m203_IC2H4O3	3.02682	4
m217_IC3H6O3	11.3528	4
m221_IC6H6O	0.08899	4
m235_IC7H8O	0.054	4
m266_IC6H5NO3	149.046	4
m311_IC6H4N2O5	79.08	4
m311_IC10H16O3	1.5005	0
m251_IC7H8O2	22.685	4
m215_IC3H4O3	0.25215	4
m190_IHNO3	28.198	0
m170_IHNCO	0.236	0
m235_IN2O5	16.495	0
m154_IHCN	0.18906	0
m197_ICl2	52.7818	4.7
m231_IC3H4O4	87.5745	0
m245_IC4H6O4	165.059	0
m249_IC4H10O4	14.3014	0
m259_IC5H8O4	44.366	0
m273_IC6H10O4	12.2795	0
m287_IC7H12O4	48.982	0
m289_IC6H10O5	60.1145	0
m303_C6H8IO6	15.2374	0
m315_IC9H16O4	32.5696	0
m329_C10H18IO4	6.89967	0
m357_C12H22IO4	7.24383	0
m381_C10H22IO7	1.31096	0
m282_IC6H5NO4	92.4555	0
m279_C5H12IO5	30.6609	0

## Sheet: humidity curve
NO.	species	humidity curves under absolute humidity=0
1	formic acid	y=0.127551+0.872449*exp(-0.17817*x)
2	acetic acid	y=0.171248+0.828752*exp(-0.13877*x)
3	propionic acid	y=0.140963+0.859037*exp(-0.14651*x)
4	butyric acid	y=0.160271+0.839729*exp(-0.14013*x)
5	pentanoic acid	y=0.138912+0.861088*exp(-0.14626*x)
6	glycolic acid	y=8.65274-7.65274*exp(-0.045146*x)
7	pyruvic acid	y=0.0941515+0.905849*exp(-0.14162*x)
8	acrylic acid	y=0.129762+0.870238*exp(-0.14167*x)
9	lactic acid	y=0.308929+0.691071*exp(-0.083626*x)
10	catechol	y=0.151413+0.848587*exp(-0.062673*x)
11	methylcatechol	y=0.149144+0.850856*exp(-0.091608*x)
12	isocyanic acid	y=0.159928+0.840072*exp(-0.18965*x)
13	succinic acid	y=0.714782+0.285218*exp(-0.13952*x)
14	4-nitrocatechol	y=0.862608+0.137392*exp(-0.027539*x)
15	levoglucosan	y=0.846975+0.153025*exp(-0.10338*x)
16	citric acid	y=1.34354-0.343536*exp(-0.036028*x)
17	hydrocyanic acid	y=0.0317+0.9683*exp(-0.29354*x)
18	chlorine	y=25.587-24.587*exp(-0.58499*x) AH<7 mmol/mol
		y=19.014+9.2161*exp(-0.036799*x) AH>=7 mmol/mol
19	nitric acid	y=1.63368-0.63368*exp(-1.8448*x) AH<2.1
		y=0.0092005+2.0256*exp(-0.10856*x) AH>=2.1
20	nitryl chloride	y=8.1683-7.1683*exp(-3.7229*x)
21	dinitrogen pentoxide	y=-10.548+12.716*exp(-((x-7.7151)/24.848)^2） AH<9.4
		y=2.2176-2.0982/(1+exp(-(x-14.915)/2.1525)) AH>=9.4
