# Supplementary material for: Chemical characterization of oxygenated organic compounds in the gas phase and particle phase using iodide CIMS with FIGAERO in urban air
Source: Copernicus journal article supplement (doi:10.5194/acp-21-8455-2021), 2021-06-03
Supplement: Supplementary file 1 [file acp-21-8455-2021-supplement.zip › overview of FIGAERO-CIMS measurements_SI_ycs_v40.pdf]

*Supplement of*

**Chemical characterization of oxygenated organic compounds  
in gas-phase and particle-phase using iodide-CIMS with  
FIGAERO in urban air**

Chenshuo Ye<sup>1</sup>, Bin Yuan<sup>2,3,\*</sup>, Yi Lin<sup>2,3</sup>, Zelong Wang<sup>2,3</sup>, Weiwei Hu<sup>4</sup>, Tiange Li<sup>2,3</sup>, Wei  
Chen<sup>4</sup>, Caihong Wu<sup>2,3</sup>, Chaomin Wang<sup>2,3</sup>, Shan Huang<sup>2,3</sup>, Jipeng Qi<sup>2,3</sup>, Baolin Wang<sup>5</sup>,  
Chen Wang<sup>5</sup>, Wei Song<sup>4</sup>, Xinming Wang<sup>4</sup>, E Zheng<sup>2,3</sup>, Jordan E. Krechmer<sup>6</sup>, Penglin  
Ye<sup>7</sup>, Zhanyi Zhang<sup>2,3</sup>, Xuemei Wang<sup>2,3</sup>, Douglas R. Worsnop<sup>6</sup>, Min Shao<sup>2,3,1</sup>

<sup>1</sup> College of Environmental Sciences and Engineering, Peking University, Beijing  
100871, China

<sup>2</sup> Institute for Environmental and Climate Research, Jinan University, Guangzhou  
511443, China

<sup>3</sup> Guangdong-Hongkong-Macau Joint Laboratory of Collaborative Innovation for  
Environmental Quality, Guangzhou 511443, China

<sup>4</sup> Guangzhou Institute of Geochemistry, Chinese Academy of Sciences, Guangzhou  
511443, China

<sup>5</sup> School of Environmental Science and Engineering, Qilu University of Technology,  
Jinan 250353, China

<sup>6</sup> Aerodyne Research, Inc., 45 Manning Rd., Billerica, MA, USA

<sup>7</sup> Shanghai Key Laboratory of Atmospheric Particle Pollution and Prevention (LAP<sup>3</sup>),  
Department of Environmental Science and Engineering, Fudan University, Shanghai  
200438, China

\*Correspondence to: byuan@jnu.edu.cn

## Section S1. Determination of response factors for uncalibrated species

The concentration of one species A is calculated as:

$$[A] = \frac{\text{signal}}{\text{response factor}} = \frac{\text{signal}}{\left(S_{\max} * \frac{1}{S_0}\right) * \text{relTrans}}$$

The response factors of iodide adducts are determined via determining

(a)  $\frac{1}{S_0}$ : sensitivity of species A relative to maximum sensitivity,  $S_{\max}$ ;

(b) *relTrans*: relative transmission of species A, i.e., transmission efficiency of species A relative to primary ions.

### 1.1 Relative sensitivity

Previous work has verified the connections among the binding energy of the iodide-adduct bond, the voltage dissociating iodide adducts and the sensitivity of corresponding species (Iyer et al., 2016; Lopez-Hilfiker et al., 2016). First, we performed the voltage scanning procedure on the gases during different time of day: morning, afternoon, evening and night. Then we used sigmoidal function with constraints to fit the fraction of remaining signal and  $dV$  which is the voltage difference of the interface between two quadrupoles in CIMS. Every fit of an individual iodide adduct yielded two parameters:  $S_0$ , the relative signal at much weaker  $dV$  compared to the signal under operational  $dV$ ;  $dV_{50}$ , the voltage at which half of the signal is removed (i.e. half of an iodide adduct dissociate). We constrained that  $S_0$  should be larger than 0.9 and  $dV_{50}$  should be less than 50. We averaged reasonable results of inverse  $S_0$  and  $dV_{50}$  for every iodide adduct. After removing outliers (Motulsky and Brown, 2006), we applied sigmoidal fit to the results of individual fits of all the iodide adducts and obtained an empirical relationship between relative sensitivity and  $dV_{50}$ . As shown in Fig. S7a, our result is very similar to the curve reported in Lopez-Hilfiker et al., 2016. There are 107 of 1334 iodide adducts that we failed to obtain  $dV_{50}$ , so we assume that they have a relative sensitivity of 0.23 which is the left limit of sigmoidal curve in Fig. S7a.

We took the calibration factor of levoglucosan, 60 ncps/ppt, as the maximum sensitivity. On the one hand, levoglucosan is one of the compounds that we calibrated

most frequently; on the other hand, it is one of the maximum sensitivity compounds (Iyer et al., 2016) and has a transmission efficiency very close to primary ions (see Sect. 1.2). The possible reason why the iodide cluster of  $C_6H_{10}O_5$  had a relative sensitivity lower than one is that it included isomers which were weakly bonded with iodide. Sensitivities derived from voltage scanning for gaseous species would be applied to particle-phase species, as discussed in the supplement file of Isaacman-VanWertz et al., 2018.

## 1.2 Relative transmission efficiency

Transmission efficiency of an ion in CIMS instrument depends on its mass-to-charge ratio. Known compounds across the  $m/z$  range of interest were introduced into the CIMS one by one and the relative transmission as a function of  $m/z$  was determined via comparing the increase of analyte ions relative to the decrease of primary ions (Heinritzi et al., 2016). Compounds used for this calibration were formic acid, acetic acid, lactic acid and C2-C5 perfluorinated acids ( $C_2HF_3O_2$ ,  $C_3HF_5O_2$ ,  $C_4HF_7O_2$ ,  $C_5HF_9O_2$ ). The gaussian function was applied for fitting this dependence curve as shown in Fig. S7b.

The final response factors for iodide adducts are plotted in Fig. S7c. For 35 species that we had calibrated, response factors derived were replaced by calibration factors when converting their signals to concentrations.

## Section S2. $\overline{OS}_C$ of a $C_xH_yO_z$ and $C_xH_yN_{1,2}O_z$ compound

The  $\overline{OS}_C - n_C$  space which plots  $\overline{OS}_C$  as the function of carbon number, provides a framework for describing the bulk chemical properties and the evolution of organics (Kroll et al., 2011). The approximate  $\overline{OS}_C$  of a  $C_xH_yO_z$  compound was calculated as:

$$\overline{OS}_C = 2 \times \frac{O}{C} - \frac{H}{C} \quad (3)$$

For  $C_xH_yN_{1,2}O_z$  compounds, the influence of N is dependent on functional groups so we made several assumptions to classify them. (1) N-containing functional groups are nitro (-NO<sub>2</sub>) or nitrate (-NO<sub>3</sub>) in our case; (2) N-containing aromatics feature nitro moieties and N-containing aliphatic hydrocarbons feature nitrate moieties; (3) N-

containing aromatics have 6-9 carbon atoms and less hydrogen atoms than aliphatic hydrocarbons with the same carbon atoms. This was not an absolutely right classification but at least it provided a rough separation between nitro compounds and nitrate compounds for most  $C_xH_yN_{1,2}O_z$  species. After the above step,  $3 \times \frac{N}{C}$  and  $5 \times \frac{N}{C}$  was minus from equation (3) for nitro compounds and for nitrate compounds, respectively:

$$\overline{OS_C} = 2 \times \frac{O}{C} - \frac{H}{C} - (3 \text{ or } 5) \times \frac{N}{C} \quad (4)$$

### Section S3. Comparison of humidity dependences with literature

Humidity dependence curves for most species shown in Fig. S5 are similar with those determined by Lee et al (2014). There are some discrepancies: e.g. (1) obvious positive slope for formic acid under very low humidity in Lee et al (2014); (2) mostly negative slope for nitric acid (for absolute humidity >2.5 mmol/mol), whereas positive slope in Lee et al (2014) (for water vapor pressure <8 hPa).

These discrepancies probably resulted from the difference of pressures in the IMR between the two work: 90 mbar in Lee et al (2014) versus 380 mbar in this work. Table S3 compares the water vapor pressures used in the two studies. The maximum partial pressure of water in this work is  $380 \text{ mbar} \times 25 \text{ mmol/mol} = 9.5 \text{ mbar}$ , higher than 0.8 mbar in Lee et al. (2014). Therefore, the positive slope for formic acid for low humidity is very narrow in our work. For the same reason, their calibrations did not observe the negative slope for nitric acid as their water pressure <0.8 mbar.

Over all, the humidity dependences in Lee et al (2014) and our work are pretty consistent if considering the water vapor pressure in the IMR. The humidity range used in our calibration experiments is sufficient to cover the humidity variations during the campaign (the range was 8.9-34.4 mmol/mol, and mean value was  $22.1 \pm 5.3 \text{ mmol/mol}$ ).

## References

- Heinritzi, M., Simon, M., Steiner, G., Wagner, A. C., Kürten, A., Hansel, A. and Curtius, J.: Characterization of the mass-dependent transmission efficiency of a CIMS, *Atmos. Meas. Tech.*, 9(4), 1449–1460, doi:10.5194/amt-9-1449-2016, 2016.
- Isaacman-VanWertz, G., Massoli, P., O’Brien, R., Lim, C., Franklin, J., Moss, J., Hunter, J., Nowak, J., Canagaratna, M., Misztal, P., Arata, C., Roscioli, J., Herndon, S., Onasch, T., Lambe, A., Jayne, J., Su, L., Knopf, D., Goldstein, A., Worsnop, D. and Kroll, J.: Chemical evolution of atmospheric organic carbon over multiple generations of oxidation, *Nat. Chem.*, 10(4), 462–468, doi:10.1038/s41557-018-0002-2, 2018.
- Iyer, S., Lopez-Hilfiker, F., Lee, B. H., Thornton, J. A. and Kurtén, T.: Modeling the Detection of Organic and Inorganic Compounds Using Iodide-Based Chemical Ionization, *J. Phys. Chem. A*, 120(4), 576–587, doi:10.1021/acs.jpca.5b09837, 2016.
- Kroll, J. H., Donahue, N. M., Jimenez, J. L., Kessler, S. H., Canagaratna, M. R., Wilson, K. R., Altieri, K. E., Mazzoleni, L. R., Wozniak, A. S., Bluhm, H., Mysak, E. R., Smith, J. D., Kolb, C. E. and Worsnop, D. R.: Carbon oxidation state as a metric for describing the chemistry of atmospheric organic aerosol, *Nat. Chem.*, 3(2), 133–139, doi:10.1038/nchem.948, 2011.
- Lee, B. H., Lopez-Hilfiker, F. D., Mohr, C., Kurtén, T., Worsnop, D. R. and Thornton, J. A.: An iodide-adduct high-resolution time-of-flight chemical-ionization mass spectrometer: Application to atmospheric inorganic and organic compounds, *Environ. Sci. Technol.*, 48(11), 6309–6317, doi:10.1021/es500362a, 2014.
- Lopez-Hilfiker, F. D., Iyer, S., Mohr, C., Lee, B. H., Ambro, E. L. D., Kurtén, T. and Thornton, J. A.: Constraining the sensitivity of iodide adduct chemical ionization mass spectrometry to multifunctional organic molecules using the collision limit and thermodynamic stability of iodide ion adducts, *Atmos. Meas. Tech.*, 9, 1505–1512, doi:10.5194/amt-9-1505-2016, 2016.
- Motulsky, H. J. and Brown, R. E.: Detecting outliers when fitting data with nonlinear regression - A new method based on robust nonlinear regression and the false

134 discovery rate, BMC Bioinformatics, 7, 1–20, doi:10.1186/1471-2105-7-123, 2006.  
135 Wu, C., Wang, C., Wang, S., Wang, W., Yuan, B., Qi, J., Wang, B., Wang, H., Wang,  
136 C., Song, W., Wang, X., Hu, W., Lou, S., Ye, C., Peng, Y., Wang, Z., Huangfu, Y.,  
137 Xie, Y., Zhu, M., Zheng, J., Wang, X., Jiang, B., Zhang, Z. and Shao, M.:  
138 Measurement report: Important contributions of oxygenated compounds to emissions  
139 and chemistry of VOCs in urban air, Atmos. Chem. Phys., 1–37, doi:10.5194/acp-  
140 2020-152, 2020.

141

142

**Table S1.** The calibrated species and corresponding calibration methods

| No. | Calibrated species                                                                                                                                                                                                                                                                                                                | Calibration method                                                                                                                                                                                                           |
|-----|-----------------------------------------------------------------------------------------------------------------------------------------------------------------------------------------------------------------------------------------------------------------------------------------------------------------------------------|------------------------------------------------------------------------------------------------------------------------------------------------------------------------------------------------------------------------------|
| 1   | <u>Chlorine</u> , <u>Hydrogen cyanide</u>                                                                                                                                                                                                                                                                                         | Gaseous standard dilution                                                                                                                                                                                                    |
| 2   | <u>Formic acid</u> , <u>Acetic acid</u> , <u>Propionic acid</u> , <u>Butyric acid</u> , <u>Pentanoic acid</u> ,<br><u>Catechol</u> , <u>Acrylic acid</u> , <u>Glycolic acid</u> , <u>Lactic acid</u> , Phenol, m-cresol, 4-<br>nitrophenol, 2,4-dinitrophenol, cis-pinonic acid, <u>3-Methylcatechol</u> ,<br><u>Pyruvic acid</u> | Dissolve standards in the water;<br>Thermally evaporate aqueous standards via the liquid<br>calibration unit (LCU, Ionicon Analytic GmbH) to generate<br>a flow at defined trace concentrations;<br>Liquid standard dilution |
| 3   | <u>Nitric acid</u> , <u>Formic acid</u>                                                                                                                                                                                                                                                                                           | Inject a constant flow into the permeation tube;<br>Dilute the outflow gradiently when its concentration is stable                                                                                                           |
| 4   | <u>Isocyanic acid</u> , <u>Dinitrogen pentoxide</u> , <u>Nitryl chloride</u>                                                                                                                                                                                                                                                      | Use the flow tube reactor to generate the flow containing<br>target compounds;<br>Gas-phase standard dilution                                                                                                                |
| 5   | Malonic acid, <u>Succinic acid</u> , Meso-erythritol, Glutaric acid, Adipic<br>acid, Pimelic acid, <u>Levoglucosan</u> , Tricarballic acid, Azelaic acid,<br>Sebacic acid, Dodecanedioic acid, <u>Citric acid</u> , Dipentaerythritol, <u>4-</u><br><u>nitrocatechol</u> , Xylitol, Heptaethylene glycol, Octaethylene glycol     | Dissolve standards in organic solvents (e.g., acetone,<br>isopropanol);<br>Deposit different amounts of solution on the FIGAERO filter                                                                                       |

143

144

**Table S2.** The concentrations used in regular calibrations during the campaign

| Solution index | Calibration date | Amount deposited on the FIGAERO filter (ng) |       |       |
|----------------|------------------|---------------------------------------------|-------|-------|
|                |                  | Levoglucozan                                | PEG-7 | PEG-8 |
| 1              | 2018/09/23       | 2500                                        | 2255  | 1129  |
|                | 2018/09/23       | 5000                                        | 4511  | 2258  |
|                | 2018/10/29       | 2500                                        | 2255  | 1129  |
| 2              | 2018/11/01       | 331.2                                       | 1409  |       |
|                | 2018/11/02       | 331.2                                       | 1409  |       |
|                | 2018/11/05       | 331.2                                       | 1409  |       |
|                | 2018/11/07       | 265.0                                       | 1127  |       |
|                | 2018/11/10       | 397.5                                       | 1691  |       |
|                | 2018/11/19       | 530.0                                       | 2254  |       |
| 3              | 2018/11/20       | 6.56                                        | 1142  | 1129  |
|                | 2018/11/20       | 13.12                                       | 2284  | 2255  |
|                | 2018/11/20       | 19.68                                       | 3425  | 3383  |
|                | 2018/11/20       | 26.24                                       | 4567  | 4511  |
|                | 2018/11/20       | 31.49                                       | 5480  | 5413  |

145

**Table S3.** Comparison of the water vapor pressures used in Lee et al (2014) and this work

| Pressure                                             | Lee et al. (2014)        | This work                                                                                                      |
|------------------------------------------------------|--------------------------|----------------------------------------------------------------------------------------------------------------|
| IMR pressure                                         | 90 mbar                  | 380 mbar                                                                                                       |
| Maximum water vapor pressure                         | 0.8 mbar                 | $AH \sim 25 \text{ mmol/mol}$ , so $P_{H_2O} = 380 \text{ mbar} \times 25 \times 10^{-3} = 9.5 \text{ mbar}$   |
| Water vapor pressure of positive slope for $CH_2O_2$ | $\sim 0.15 \text{ mbar}$ | $AH = 0.32 \text{ mmol/mol}$ , so $P_{H_2O} = 380 \text{ mbar} \times 0.32 \times 10^{-3} = 0.12 \text{ mbar}$ |
| Water vapor pressure of positive slope for $HNO_3$   | $\sim 0.8 \text{ mbar}$  | $AH = 2.1 \text{ mmol/mol}$ , so $P_{H_2O} = 380 \text{ mbar} \times 2.1 \times 10^{-3} = 0.8 \text{ mbar}$    |

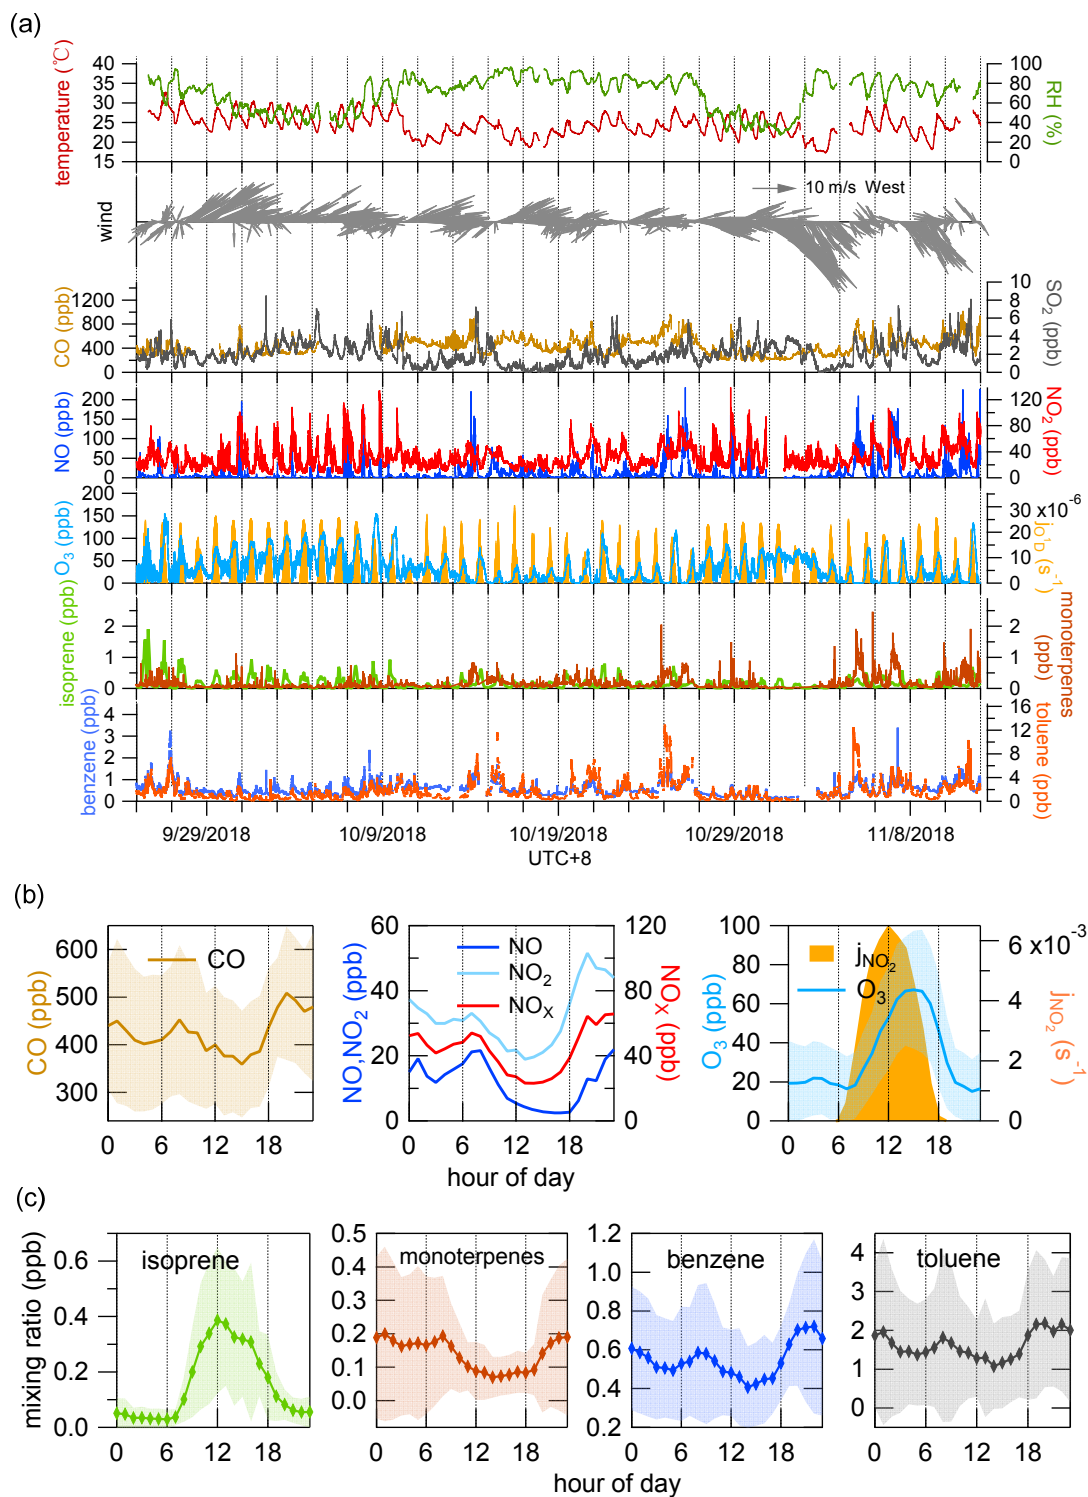

**Figure S1.** (a) Time series of meteorological parameters (temperature, relative humidity and wind), trace gases ( $CO$ ,  $SO_2$ ,  $NO$ ,  $NO_2$ ,  $O_3$ ), VOCs (isoprene, monoterpenes, benzene, toluene) and measured photolysis rate constant ( $j_{NO_2}$ ) during the campaign. (b) Diurnal trends of trace gases and  $j_{NO_2}$ . (c) Diurnal trends of VOCs (Wu et al., 2020). The shaded areas indicate one standard deviation.

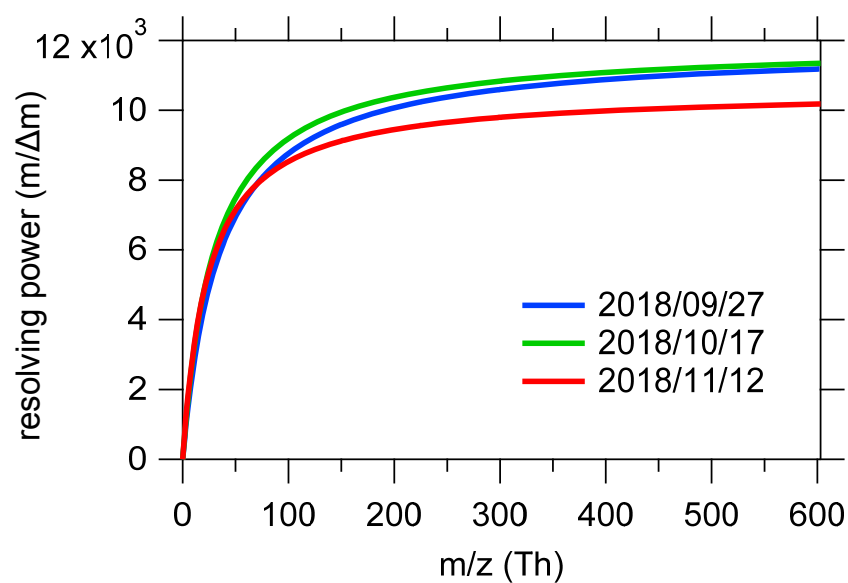

**Figure S2.** Resolving power of the time-of-flight analyzer as a function of  $m/z$  in the beginning, in the middle and in the end of the campaign.

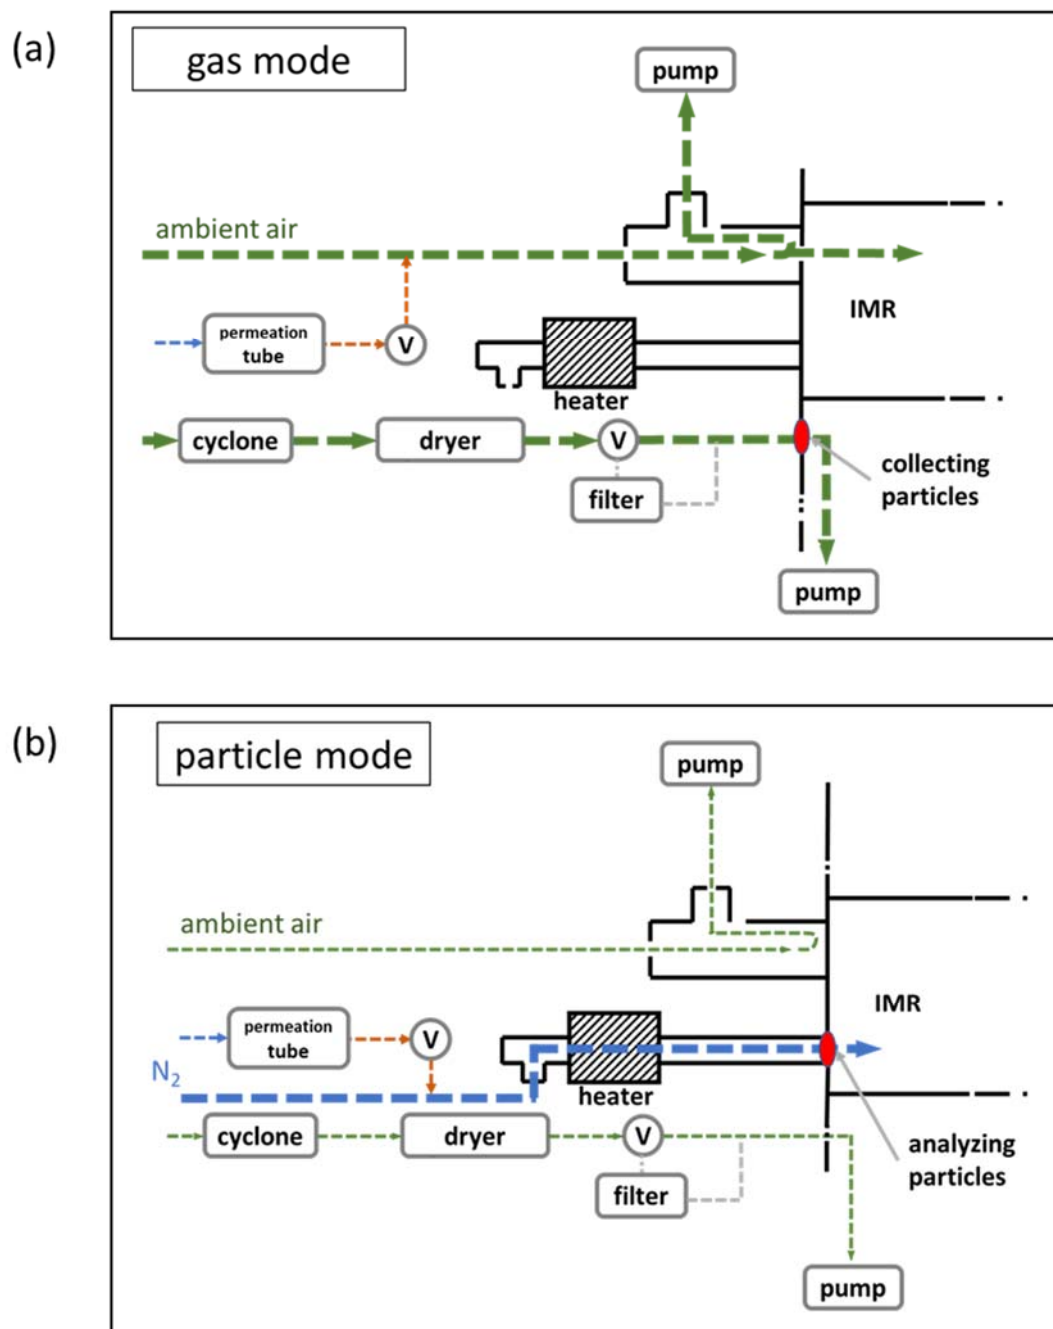

**Figure S3.** Experimental setups for (a) gas mode in which the instrument simultaneously measures gaseous compounds and collects particles and for (b) particle mode in which collected particles undergo through thermal desorption and analysis.

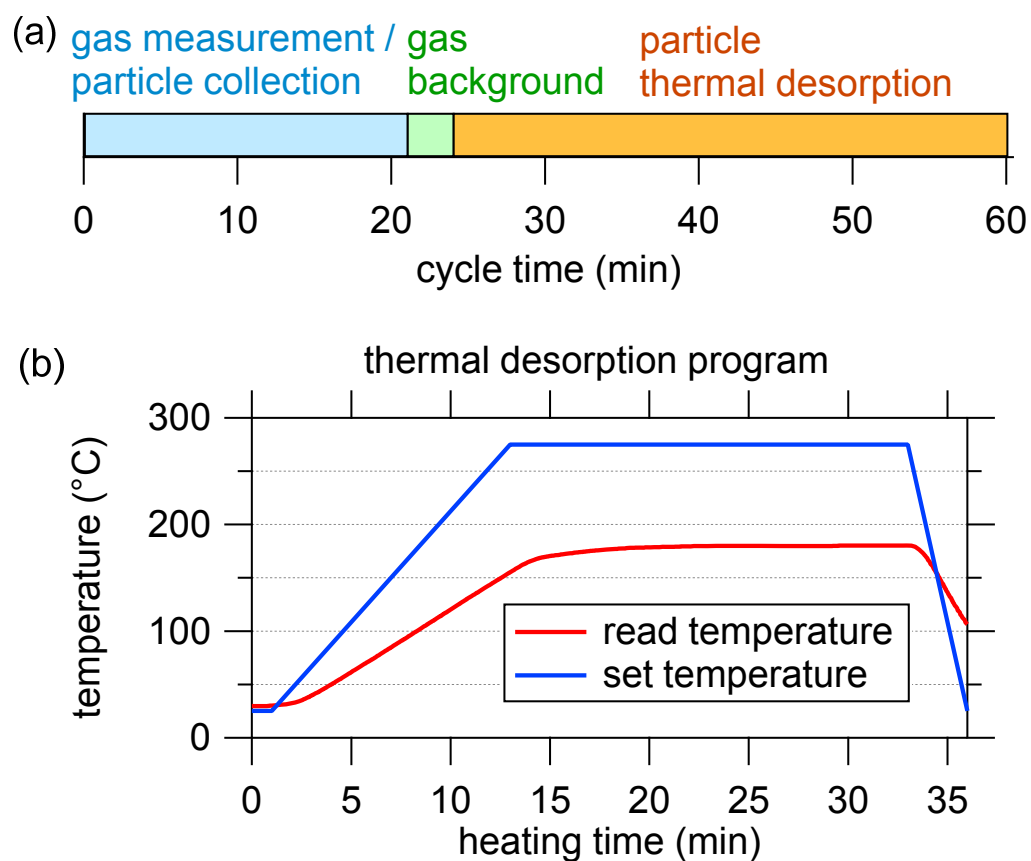

**Figure S4.** Schematic diagram of cycle modes (a) and FIGAERO heating temperature profile (b).

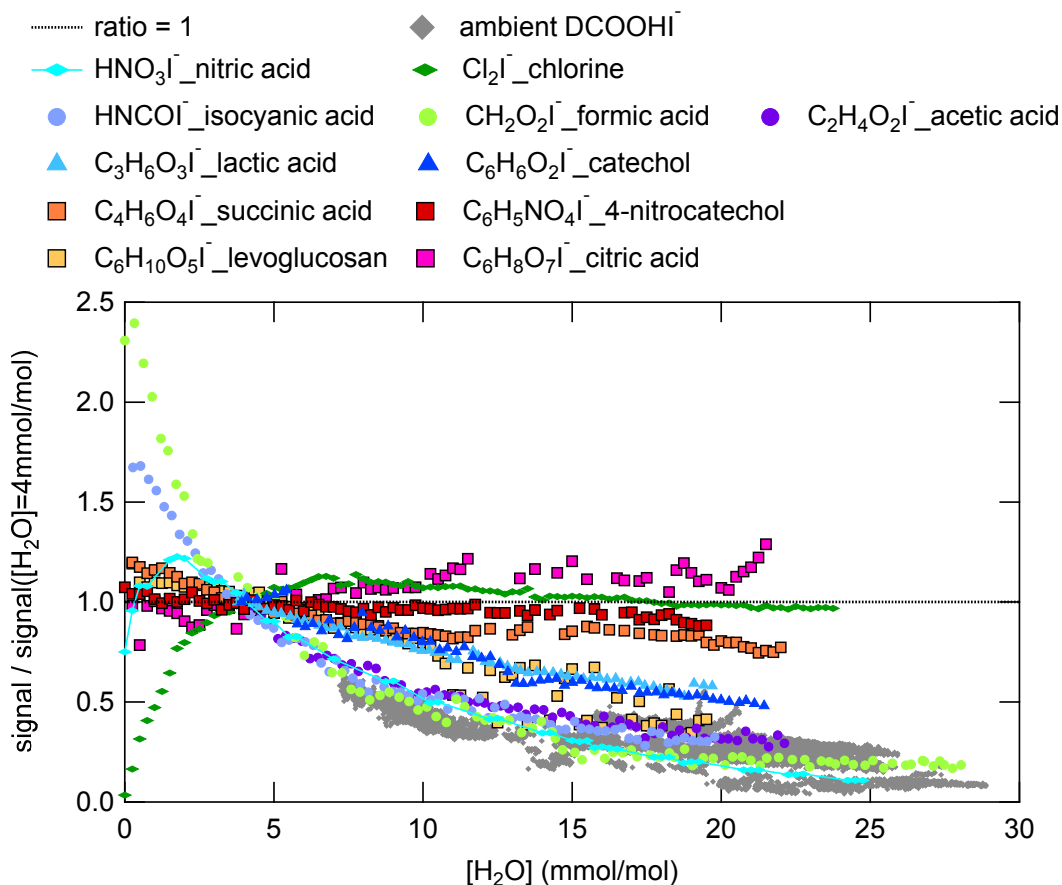

**Figure S5.** The effects of water content on the sensitivities of different species. The curves with square markers were obtained from calibrations using the FIGAERO. Other humidity curves were determined via the gas inlet. Diamonds, circles and triangles represent humidity curves of inorganic compounds, simple organic acids and multi-functional organic compounds, respectively. Gray dots show how the signal of internal standard DCOOH varied with ambient humidity. The discrepancies with humidity dependences between this work and Lee et al. (2014) are discussed in Section S3 in the supplement.

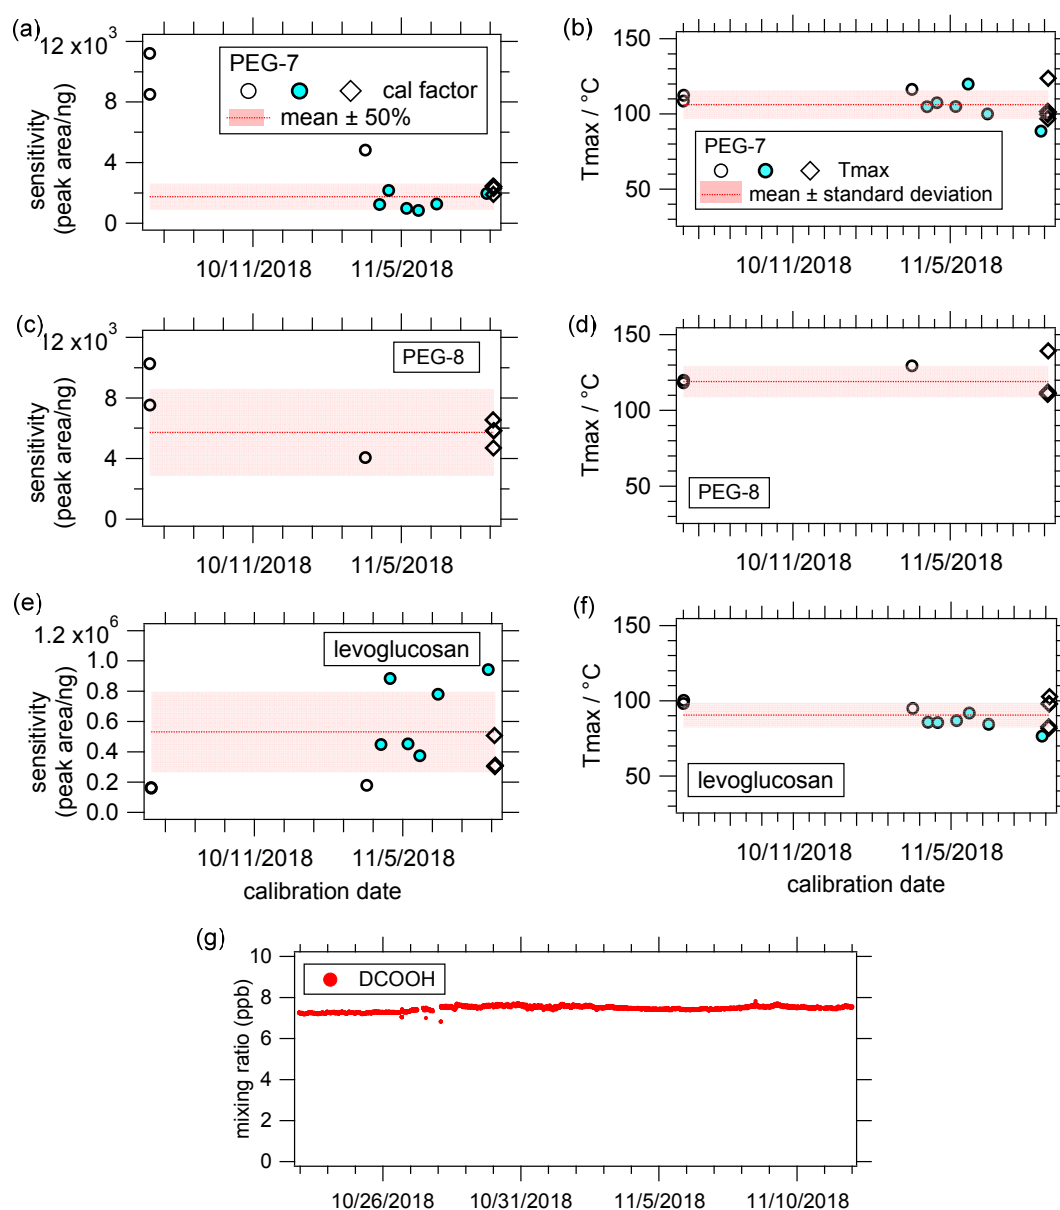

**Figure S6.** The time series of calibration factors (a, c, e) and  $T_{\max}$  (b, d, f) of hepaethylene glycol, octaethylene glycol and levoglucosan in the regular calibrations during the campaign. Three markers represent three solutions that were used (Table S2). The concentration of levoglucosan was too high in the solution used in the first two calibrations. Excess levoglucosan severely depleted primary ions, resulting in the underestimation of the response of levoglucosan. On the other hand, low concentrations of primary ions caused the overestimated normalized signals for other ions, and the calibration factors of PEG7 and PEG8 were subsequently overestimated. (g) The measured concentration of DCOOH was steady after applying humidity correction to the signal of DCOOH based on its curve shown in Fig. S5.

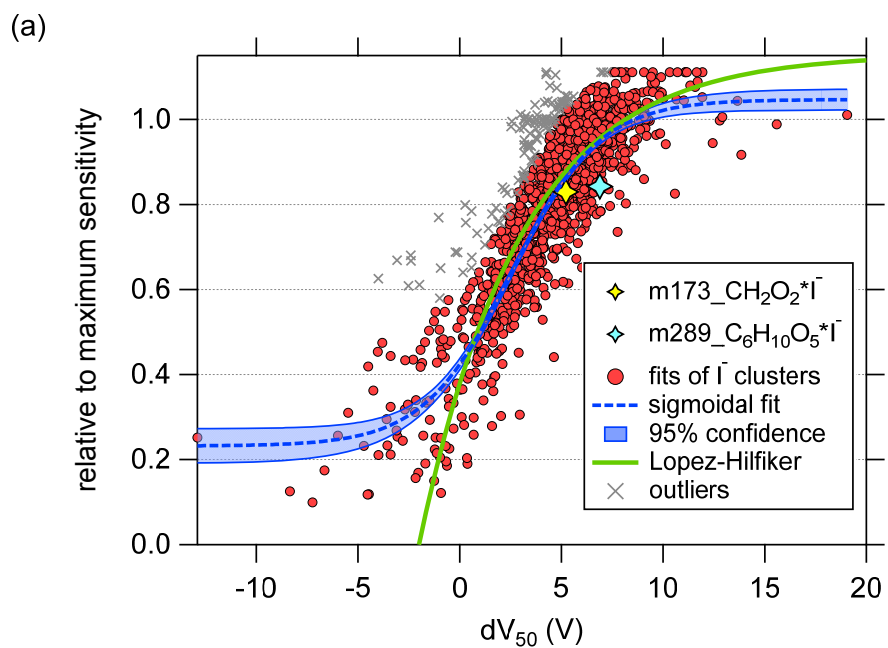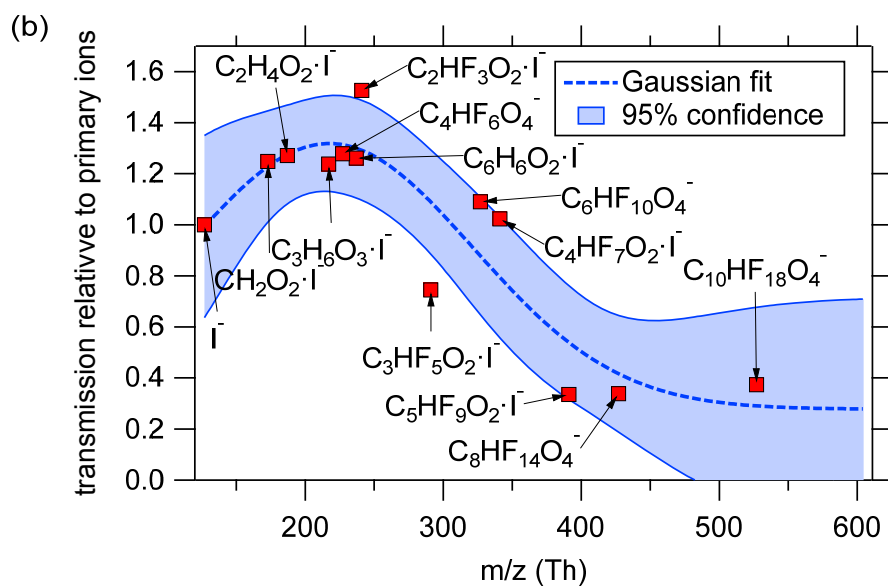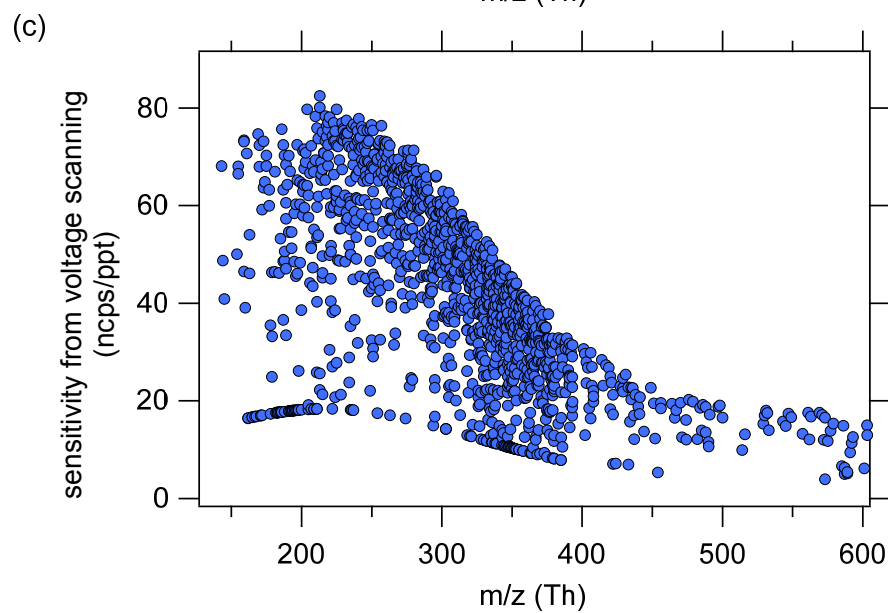

**Figure S7.** (a) Fitting the voltage scanning results as a sigmoidal function of sensitivity relative to maximum sensitivity versus  $dV_{50}$  (i.e. the voltage where half of an iodide adducts dissociate). The sigmoidal function is  $y = 0.23181 + \frac{0.81488}{1 + \exp(\frac{2.5492 - x}{2.1654})}$ . (b) Fitting relative transmission efficiency as a gaussian curve of  $m/z$ . The gauss function is  $y = 0.27777 + 1.0403 \times \exp(-(\frac{x - 217.4}{147.7})^2)$ . (c) The sensitivity derived from voltage scanning procedure. The transmission correction has been applied. The bottom line in Figure S7c that has a shape exactly the same as the transmission curve represents the points with a cutoff of 0.23 for the relative sensitivity. See text in Section S1.

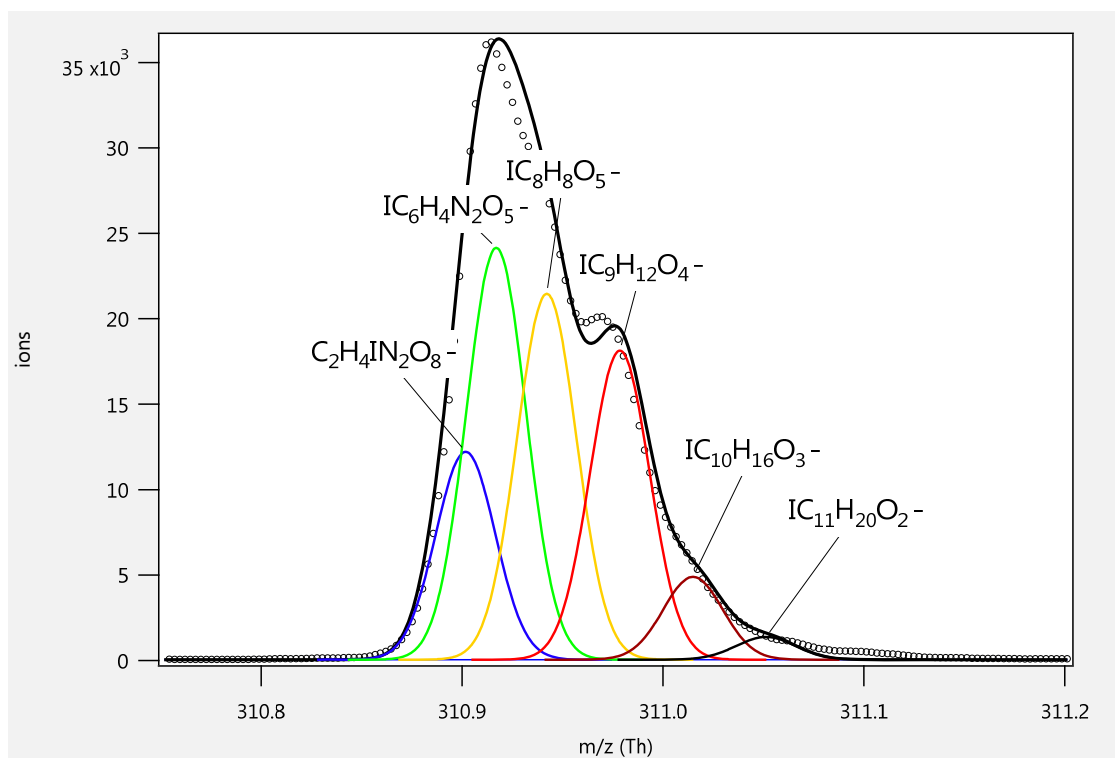

**Figure S8.** High-resolution peak fittings to the mass spectrum of I-CIMS at  $m/z$  311.

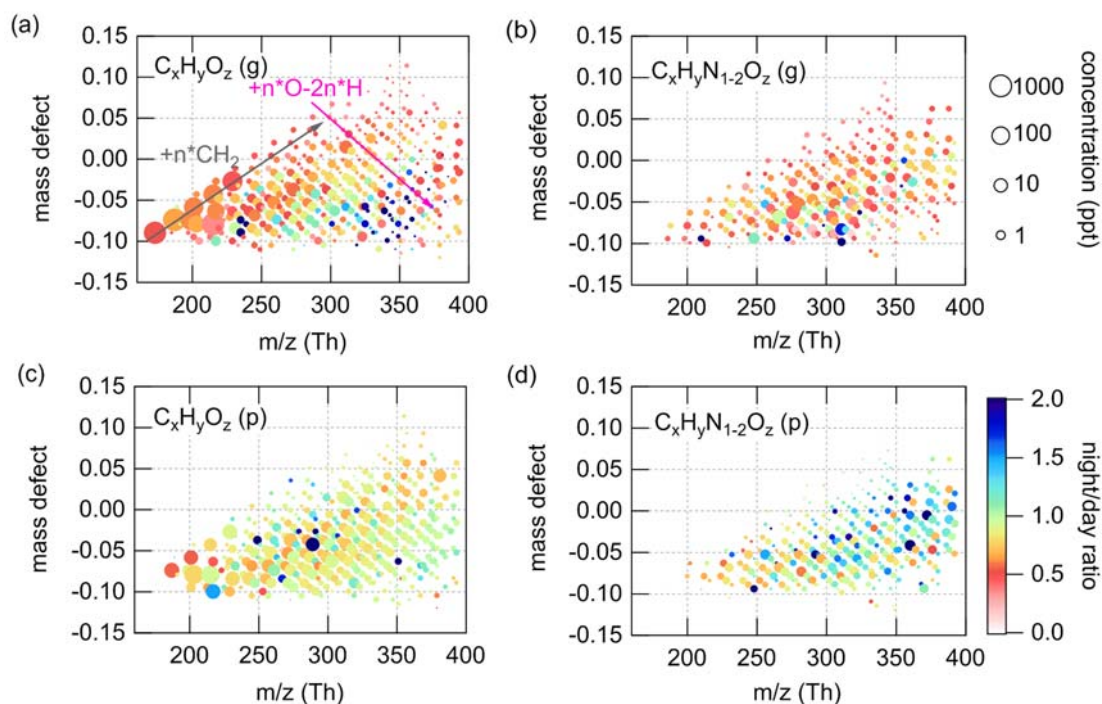

**Figure S9.** Mass defect diagram for iodide charged  $C_xH_yO_z$  compounds in the gas phase (a) and particle phase (c), and  $C_xH_yN_{1.2}O_z$  compounds in both phases (b, d). The circle size denotes the concentration and the circle color denotes the ratio of the average nighttime concentration (10 pm to 6 am) to average daytime concentration (10 am to 6 pm).

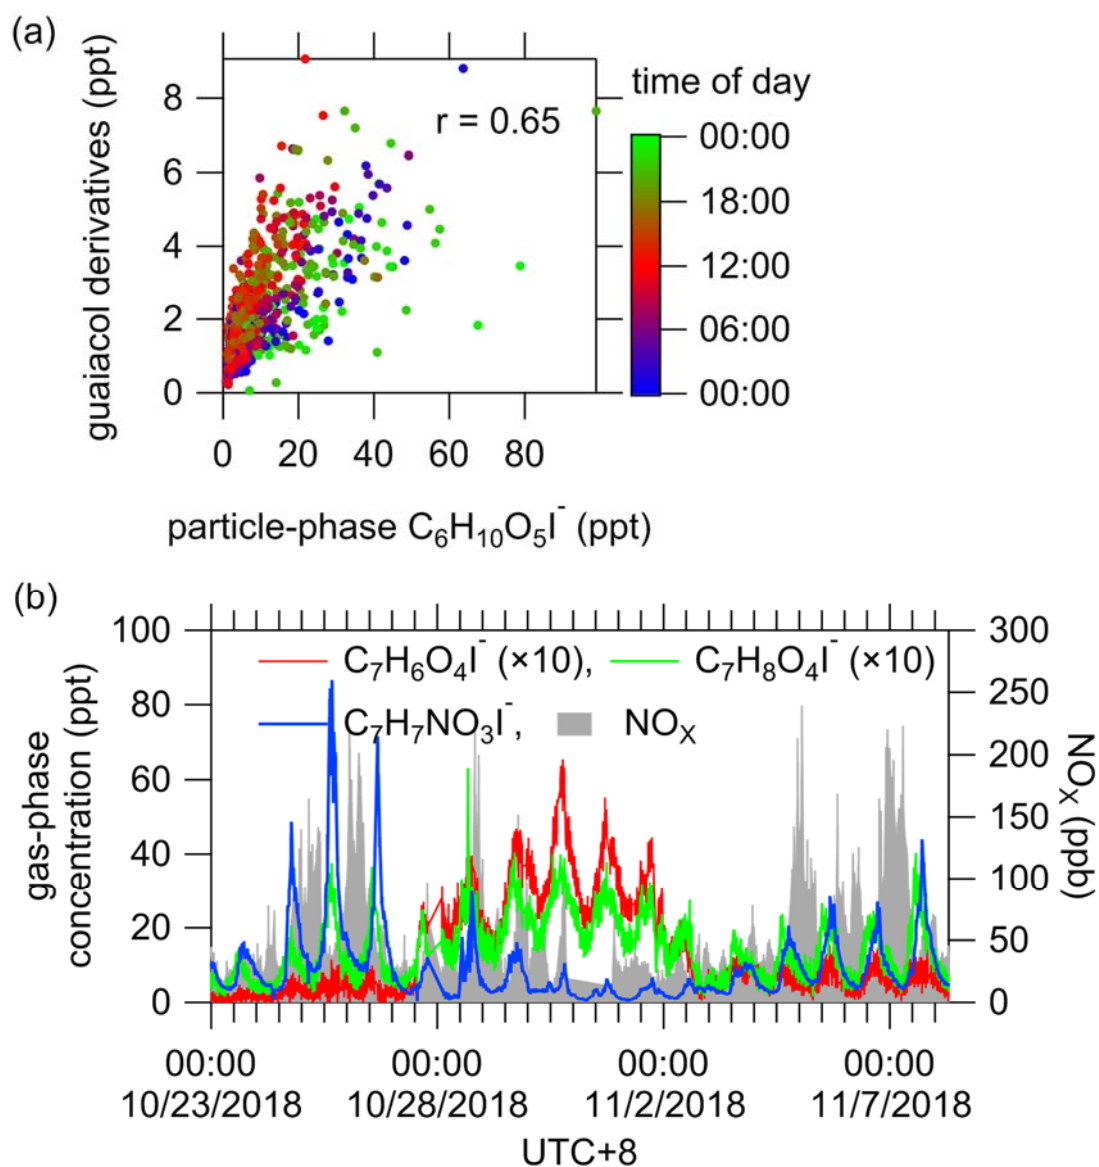

**Figure S10.** (a) Correlation between guaiacol derivatives ( $C_7H_8O_2$ ,  $C_8H_{10}O_2$ ,  $C_9H_{12}O_2$ ,  $C_8H_8O_3$ ,  $C_{10}H_{12}O_2$ ,  $C_9H_{10}O_3$ ,  $C_8H_8O_4$ ,  $C_{10}H_{10}O_3$ ,  $C_{10}H_{12}O_3$ ,  $C_{10}H_{14}O_3$ ,  $C_9H_{10}O_4$ ,  $C_{10}H_{14}O_3$ ) and levoglucosan ( $C_6H_{10}O_5$ ) in the particle phase. (b) Time series of gaseous  $C_7H_6O_4I^-$ ,  $C_7H_8O_4I^-$ ,  $C_7H_7NO_3I^-$  and  $NO_x$ .

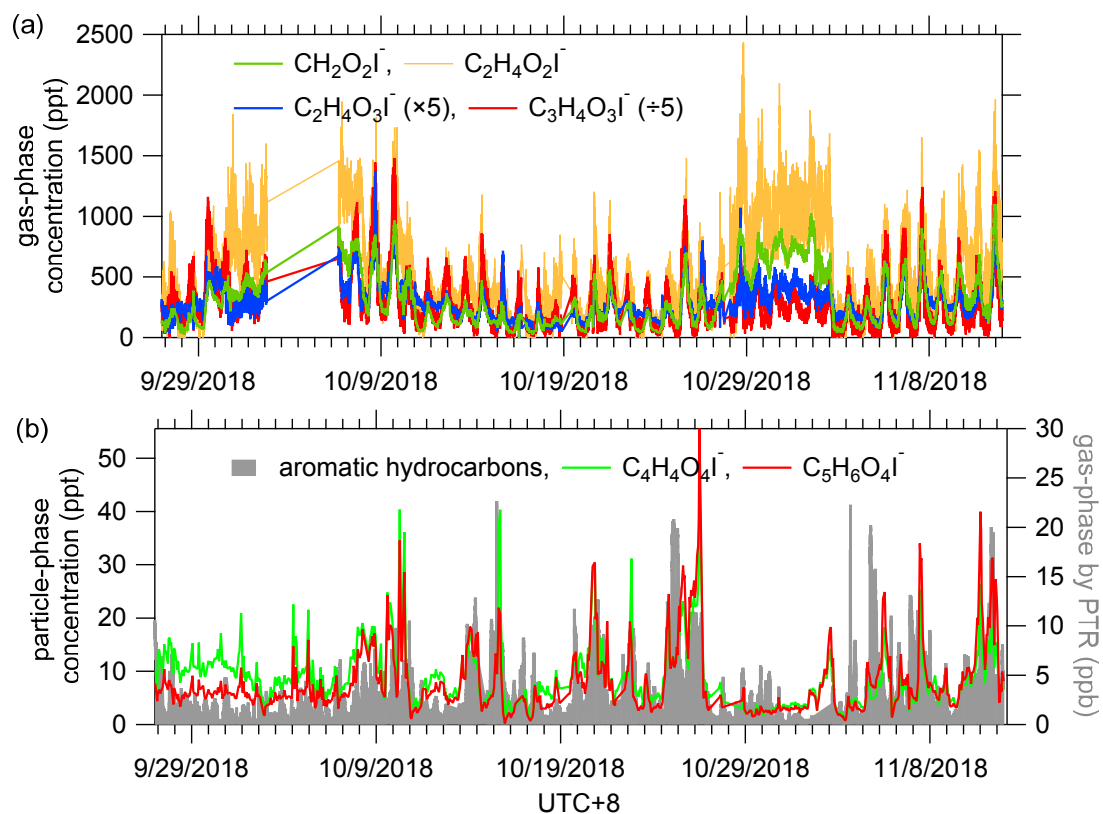

**Figure S11.** (a) Time series of low-molecular-weight organic acids in gas-phase. (b) Time series of particle-phase  $\text{C}_4\text{H}_4\text{O}_4\text{I}^-$ ,  $\text{C}_5\text{H}_6\text{O}_4\text{I}^-$  and gaseous aromatic hydrocarbons including benzene, toluene, styrene and xylene.

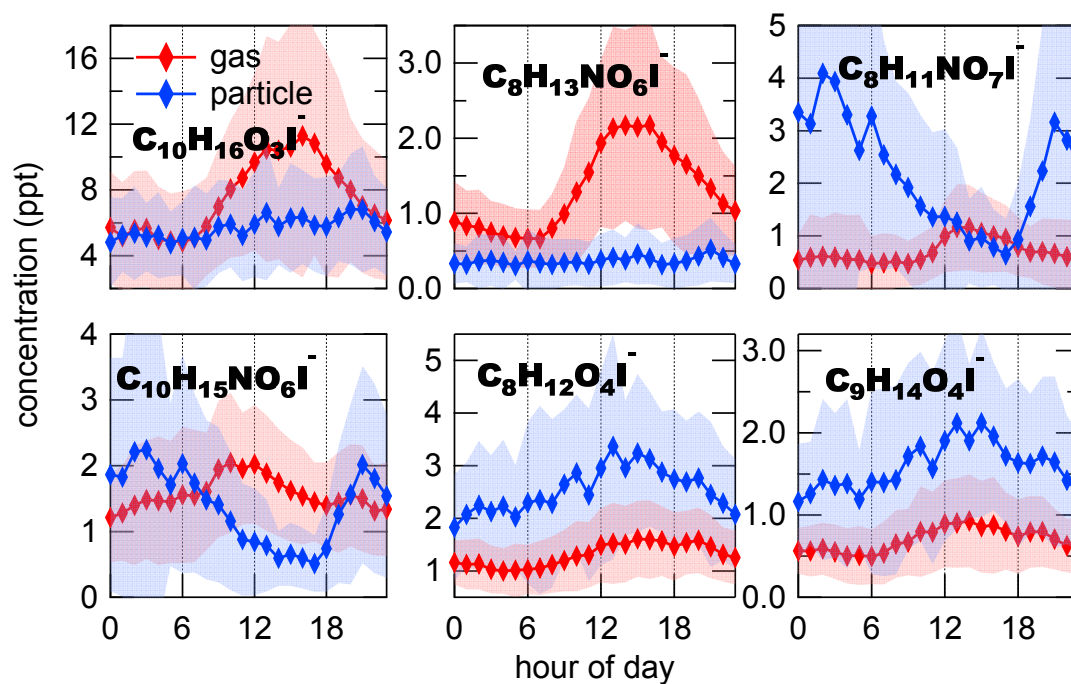

**Figure S12.** Diurnal variations of oxidation products of monoterpene in the gas phase (red) and particle phase (blue). The shaded areas indicate one standard deviation.

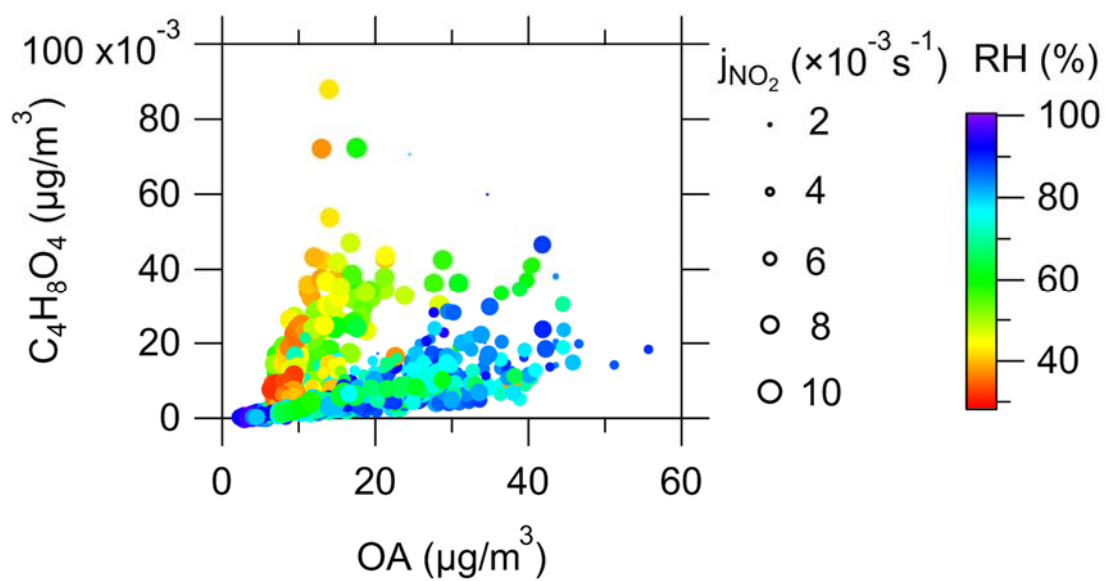

**Figure S13.** Scatterplot between particle-phase  $C_4H_8O_4$  and OA color-coded by ambient RH and size binned by the daily maximums of photolysis rates of  $NO_2$ .

218

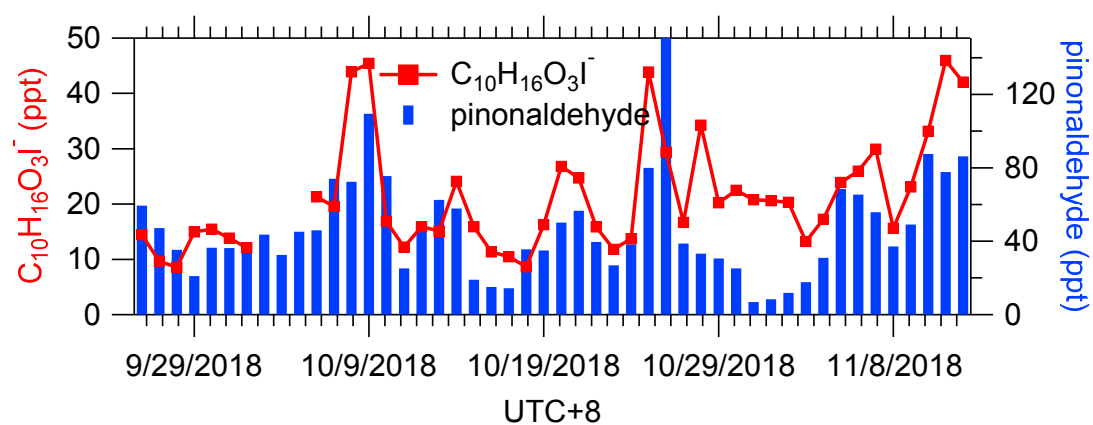

219

220 **Figure S14.** Time series of daily maximum concentrations of gaseous  $C_{10}H_{16}O_3I^-$   
 221 and pinonaldehyde ( $C_{10}H_{16}O_2H^+$ ,  $m/z$  169.12).

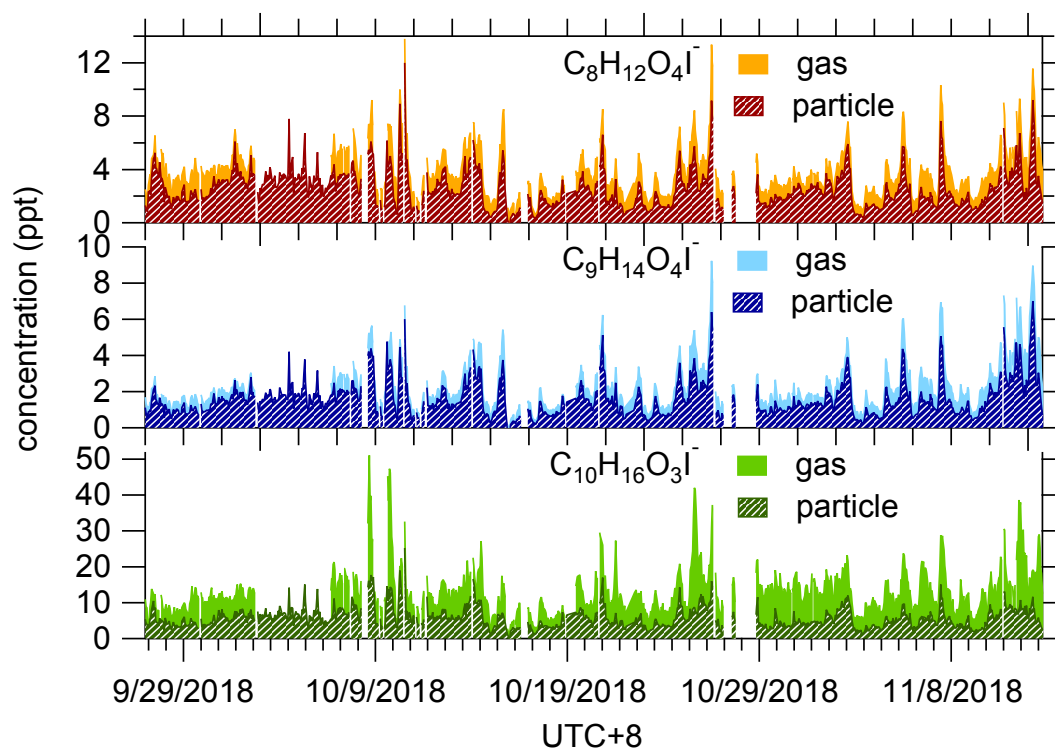

**Figure S15.** Time series of three oxidation products of monoterpenes.

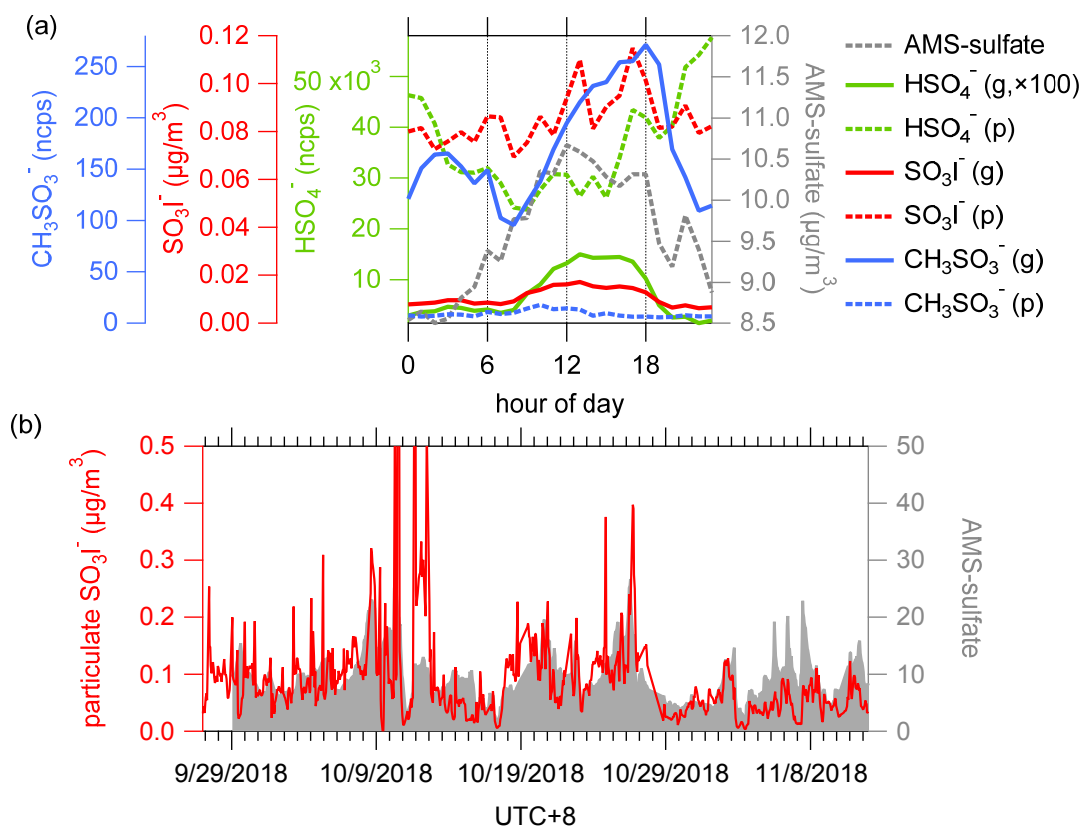

**Figure S16.** (a) Diurnal trends of S-containing ions measured by FIGAERO-I-CIMS including  $CH_3SO_3^-$ ,  $SO_3I^-$  and  $HSO_4^-$ , as well as particulate sulfate measured by AMS. (b) Time series of particle-phase  $SO_3I^-$  and sulfate.

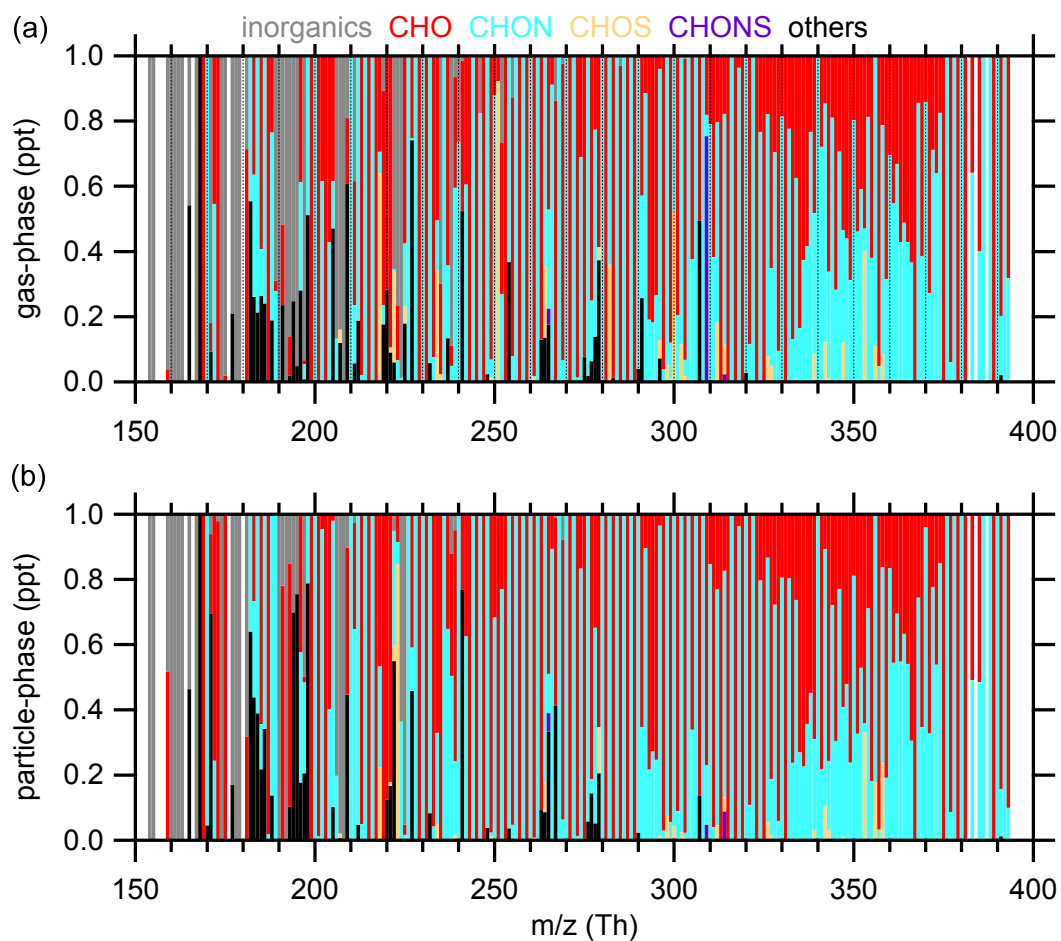

**Figure S17.** Fractions of species classes for iodide charged ions as a function of  $m/z$  in the gas phase (a) and particle phase (b). The concentration of every ion is summed to unit mass resolution to give an overall picture.

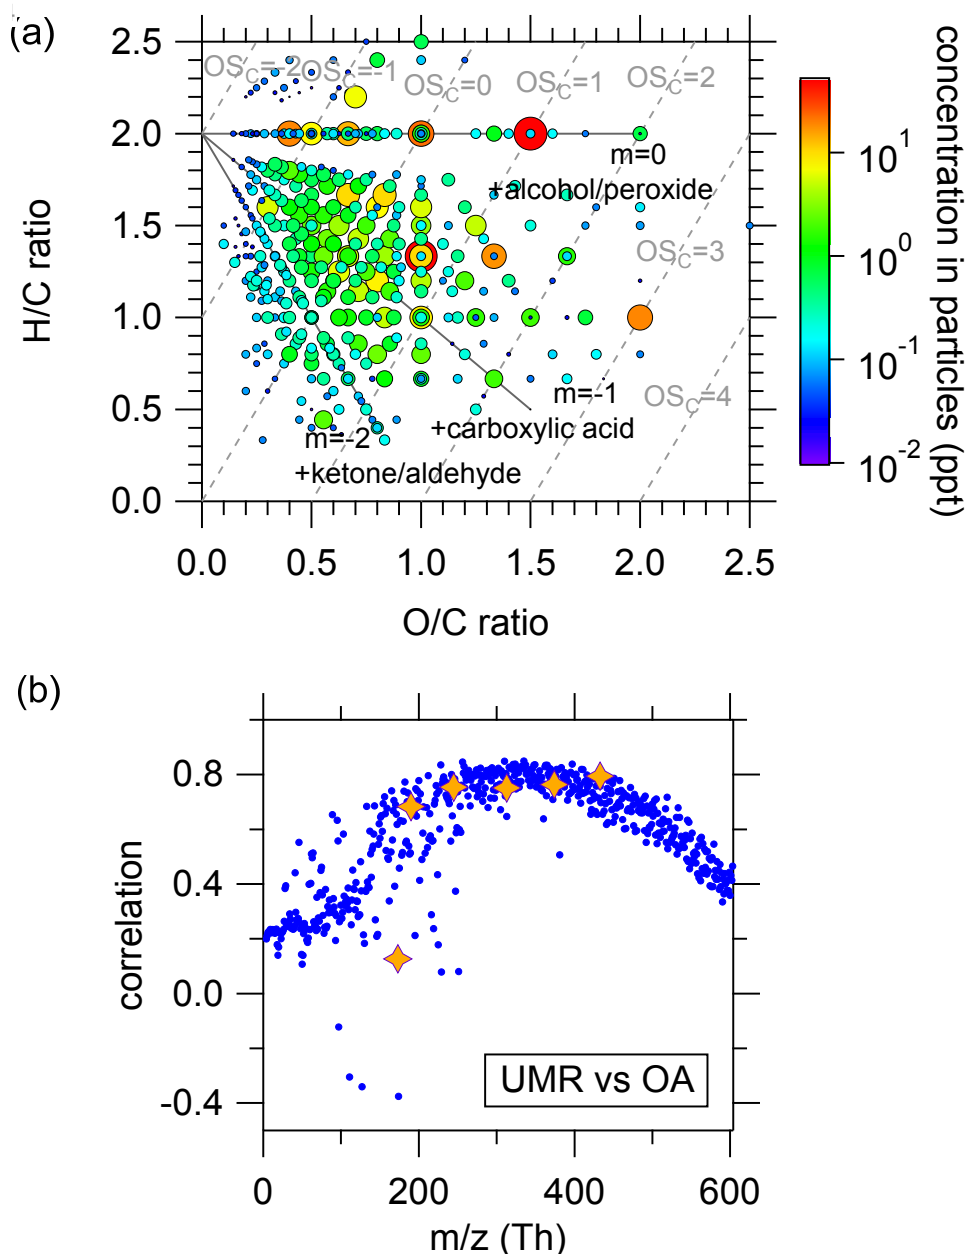

**Figure S18.** (a) Van Krevelen diagrams for particle-phase  $C_xH_yO_z$  compounds detected by FIGAERO-I-CIMS. The size of circles represents the campaign-averaged concentration of this compound in particles. (b) Correlation coefficients between OA mass concentration measured by AMS and particle-phase signals of unit mass resolution (UMR) measured by FIGAERO-I-CIMS, plotted as a function of m/z. Star markers from left to right denote  $CH_2O_2I^-$ ,  $HNO_3I^-$ ,  $C_4H_6O_4I^-$ ,  $C_9H_{14}O_4I^-$ ,  $C_9H_{13}NO_7I^-$  and  $C_{10}H_{14}N_2O_9I^-$ .
